# Supplementary material for: Rh(iii)-Catalysed solvent-free hydrodehalogenation of alkyl halides by tertiary silanes
Source: Royal Society of Chemistry journal article supplement (doi:10.1039/c8dt03703e), 2018-01-01
Supplement: c8dt03703e1.pdf [file c8dt03703e1.pdf]

Supplementary Material (ESI) for Dalton Trans.  
This Journal is (c) The Royal Society of Chemistry 2018

Supporting Information for:

## **Rh(III)-Catalysed Solvent-Free Hydrodehalogenation of Alkyl Halides by Tertiary Silanes**

Naroa Almenara,<sup>a</sup> Susan Azpeitia,<sup>a</sup> María A. Garralda\*,<sup>a</sup> and Miguel A. Huertos\*,<sup>a,b</sup>

<sup>a</sup>Faculty of Chemistry at San Sebastian, University of Basque Country, UPV/EHU, Pº Manuel Lardiazábal 3, 20018 San Sebastian, Spain.

<sup>b</sup>IKERBASQUE, Basque Foundation for Science, Bilbao, Spain.

miguelangel.huertos@ehu.es

### **Table of contents**

|                                                                                               |             |
|-----------------------------------------------------------------------------------------------|-------------|
| Dehalogenation of CDCl <sub>3</sub> using different silanes                                   | <b>S-2</b>  |
| Dehalogenation of different alkyl halides using Et <sub>3</sub> SiH                           | <b>S-5</b>  |
| Dehalogenation of polychlorinated pesticides using Et <sub>3</sub> SiH                        | <b>S-9</b>  |
| Dehalogenation of CDCl <sub>3</sub> using Et <sub>3</sub> SiH at different temperatures       | <b>S-17</b> |
| Dehalogenation of CDCl <sub>3</sub> using Et <sub>3</sub> SiD (KIE)                           | <b>S-21</b> |
| Dehalogenation of CDBr <sub>3</sub> using Et <sub>3</sub> SiH                                 | <b>S-22</b> |
| Dehalogenation of CDCl <sub>3</sub> using Et <sub>3</sub> SiH and PPh <sub>3</sub>            | <b>S-23</b> |
| Dehalogenation of CDCl <sub>3</sub> using Et <sub>3</sub> SiH under H <sub>2</sub> atmosphere | <b>S-25</b> |
| Control experiment                                                                            | <b>S-27</b> |
| H/D Exchange experiment                                                                       | <b>S-28</b> |
| References                                                                                    | <b>S-30</b> |

## Dehalogenation of $\text{CDCl}_3$ using different silanes

To a solution of **1** (4.2mg, 0.0025 mmol) in  $\text{CDCl}_3$  (0.5 mL) charged in a J. Young NMR tube was added a hydrosilane ( $\text{Et}_3\text{SiH}$  40  $\mu\text{L}$ , 0.25 mmol;  $\text{Me}_2\text{PhSiH}$ , 40  $\mu\text{L}$ , 0.25 mmol;  $\text{MePh}_2\text{SiH}$  51  $\mu\text{L}$ , 0.25 mmol;  $\text{Ph}_3\text{SiH}$ , 65.1 mg, 0.25 mmol). The solution was monitored by  $^1\text{H}$  NMR at 50  $^\circ\text{C}$ , following the disappearance of the hydrosilane resonance and the appearance of new chlorosilane and  $\text{CHDCl}_2$ .

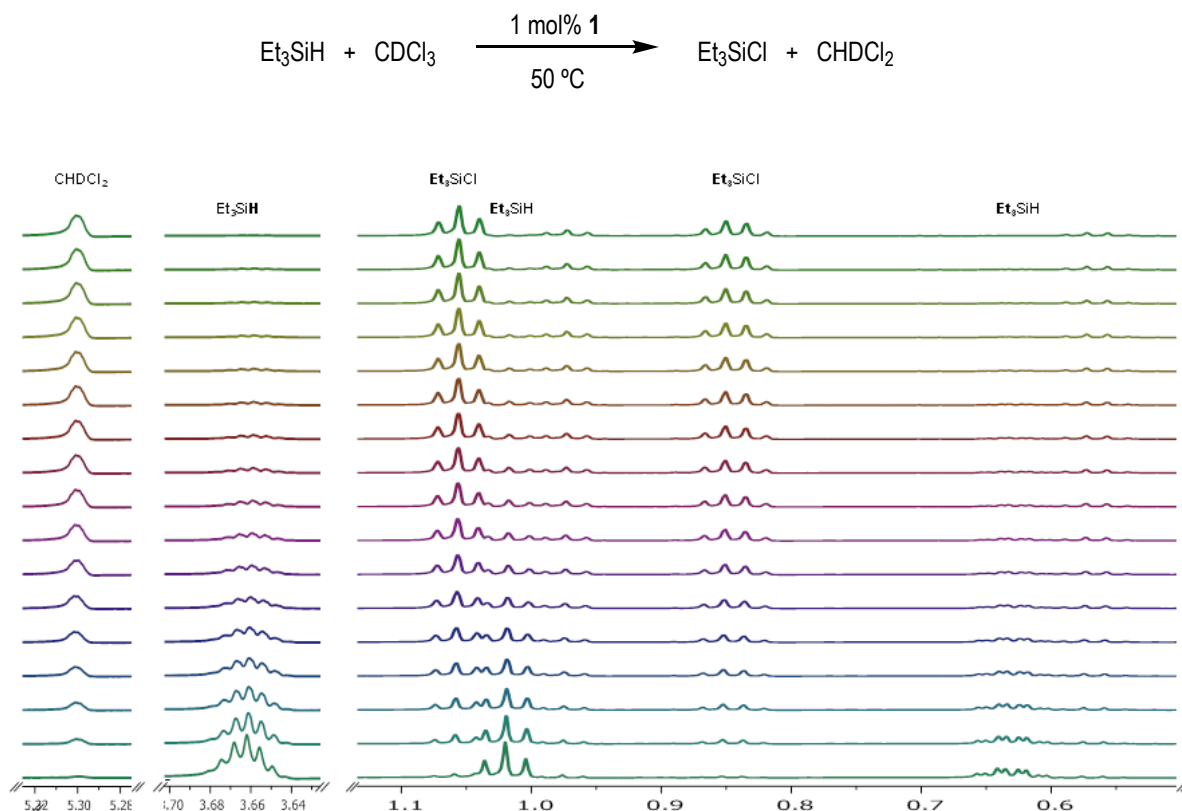

**Figure 1.** Dechlorination of  $\text{CDCl}_3$  using  $\text{Et}_3\text{SiH}$ . Reaction monitoring by  $^1\text{H}$  NMR at 50  $^\circ\text{C}$ .

Triethylchlorosilane:  $^1\text{H}$  NMR (500 MHz,  $\text{CDCl}_3$ ):  $\delta$  1.06 (t,  $J$  = 7.8 Hz, 9H), 0.84 (q,  $J$  = 7.9 Hz, 6H).

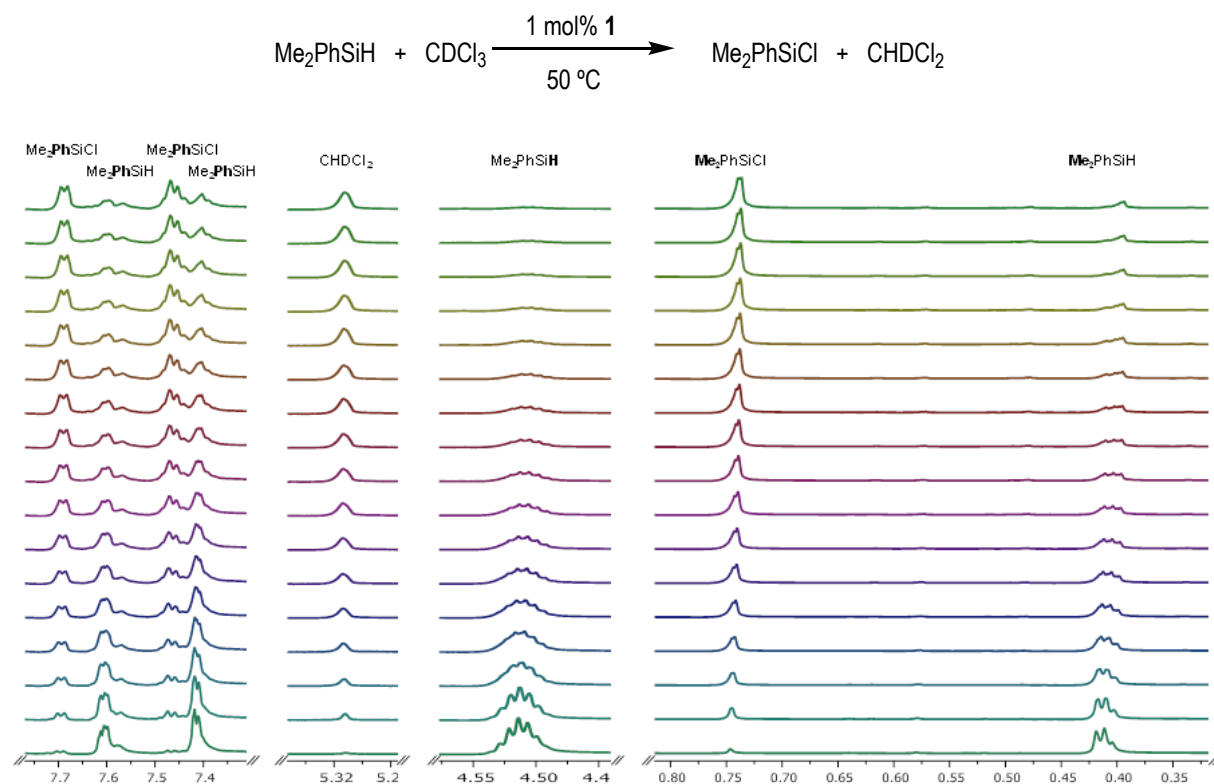

**Figure 2.** Dechlorination of  $\text{CDCl}_3$  using  $\text{Me}_2\text{PhSiH}$ . Reaction monitoring by  $^1\text{H}$  NMR at  $50\text{ }^\circ\text{C}$ .

Dimethylphenylchlorosilane:  $^1\text{H}$  NMR (500 MHz,  $\text{CDCl}_3$ ):  $\delta$  7.61 (m, 2H), 7.42 (m, 3H), 0.74 (t,  $d = 1.5\text{ Hz}$ , 6H).

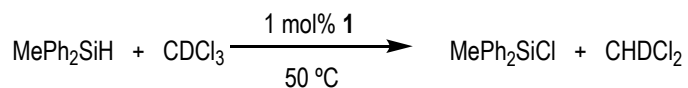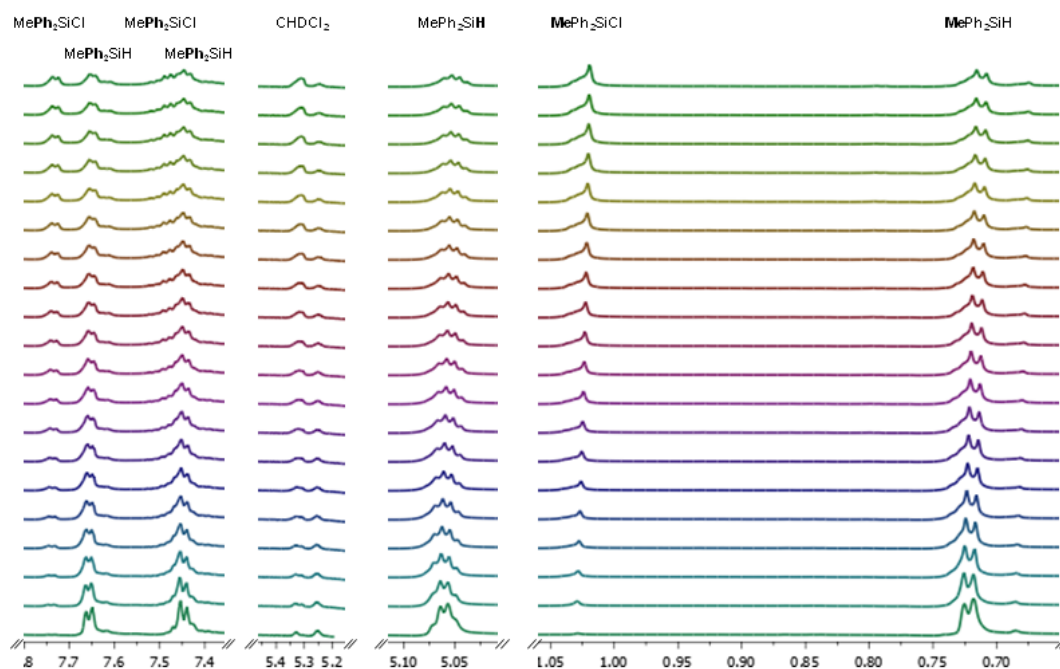

**Figure 3.** Dechlorination of  $\text{CDCl}_3$  using  $\text{MePh}_2\text{SiH}$ . Reaction monitoring by  $^1\text{H}$  NMR at  $50\text{ }^\circ\text{C}$

Methyldiphenylchlorosilane:  $^1\text{H}$  NMR (500 MHz,  $\text{CDCl}_3$ ):  $\delta$  7.73 (m, 4H), 7.48 (m, 6H), 1.02 (s, 3H).

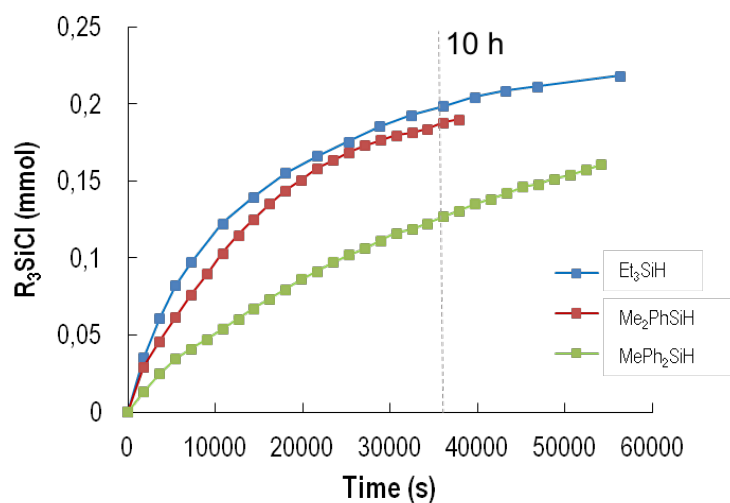

**Figure 4.** Reaction of  $\text{R}_3\text{SiH}$  with  $\text{CDCl}_3$  catalysed by **1**. Concentration of  $\text{R}_3\text{SiCl}$  vs time.

## Dehalogenation of different alkyl halides using Et<sub>3</sub>SiH

A Young flask charged with **1** (8.4 mg, 0.05 mmol), Et<sub>3</sub>SiH (80  $\mu$ L, 0.5 mmol) and the alkyl halides (benzylchloride, 57  $\mu$ L, 0.5 mmol; benzylbromide, 60  $\mu$ L, 0.5 mmol; tritylchloride, 189 mg, 0.5 mmol; tert-pentylchloride, 61  $\mu$ L, 0.5 mmol; tetrachloroethane, 53  $\mu$ L, 0.5 mmol) was stirred during 12 h at 60  $^{\circ}$ C. After this time, CDCl<sub>3</sub> and dichloroethane (10  $\mu$ L, 0.0126 mmol, Internal Standard) were added and a <sup>1</sup>H NMR spectra was carried out at room temperature to calculate the conversion.

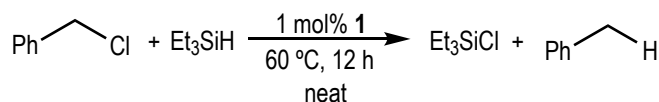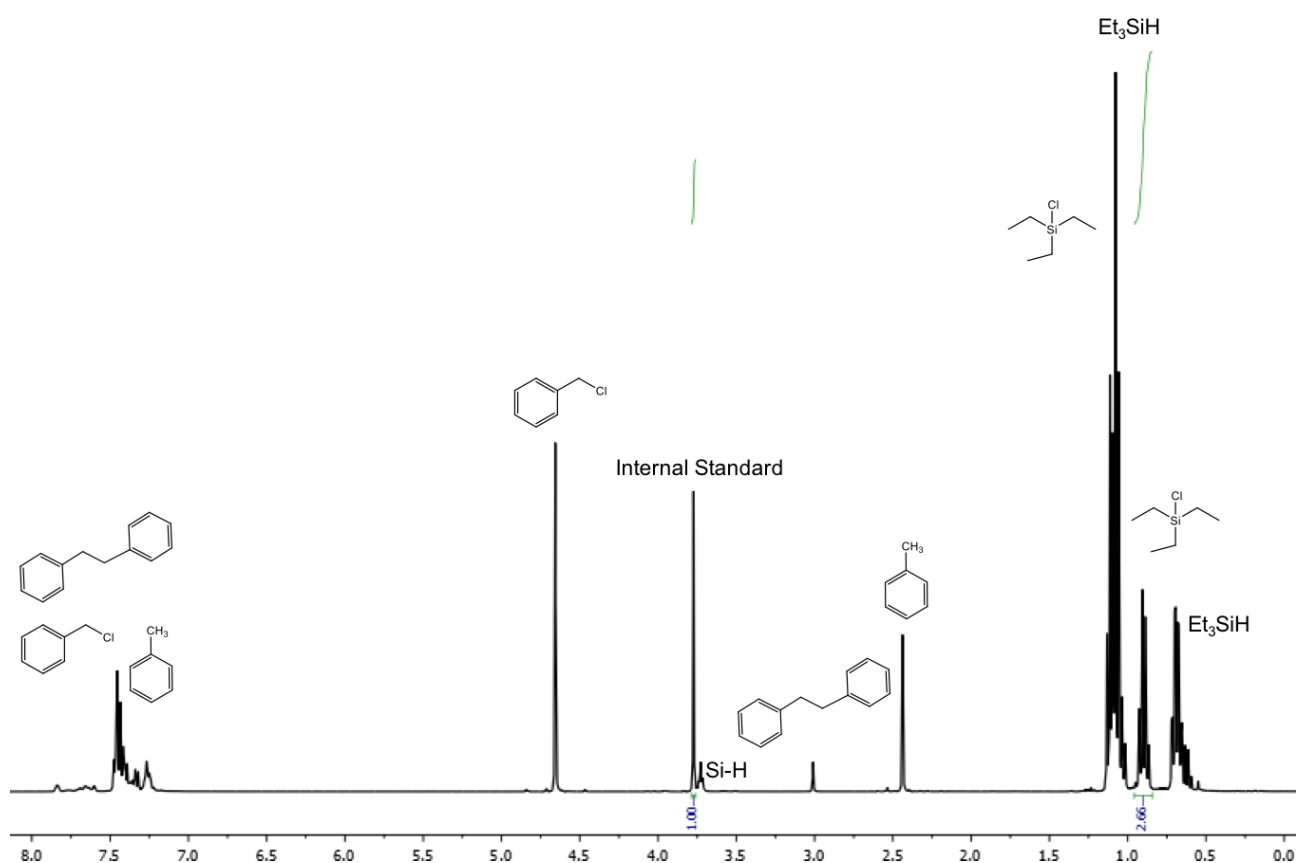

**Figure 5.** <sup>1</sup>H NMR spectrum for the reaction of dechlorination of benzyl chloride using Et<sub>3</sub>SiH.

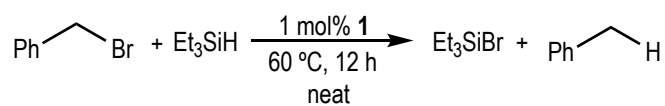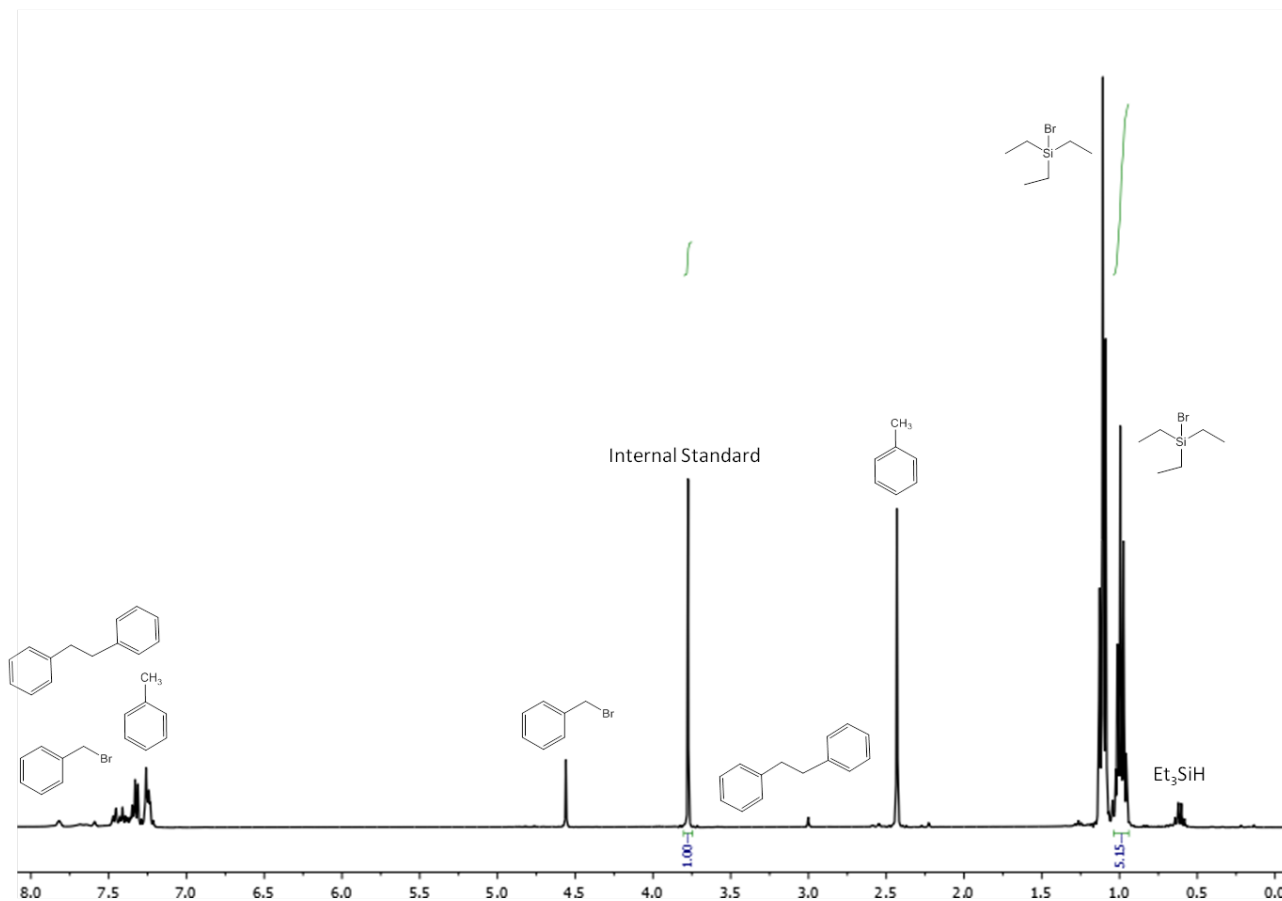

**Figure 6.** <sup>1</sup>H NMR spectrum for the reaction of debromination of benzyl bromide using Et<sub>3</sub>SiH.

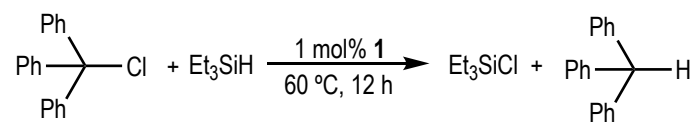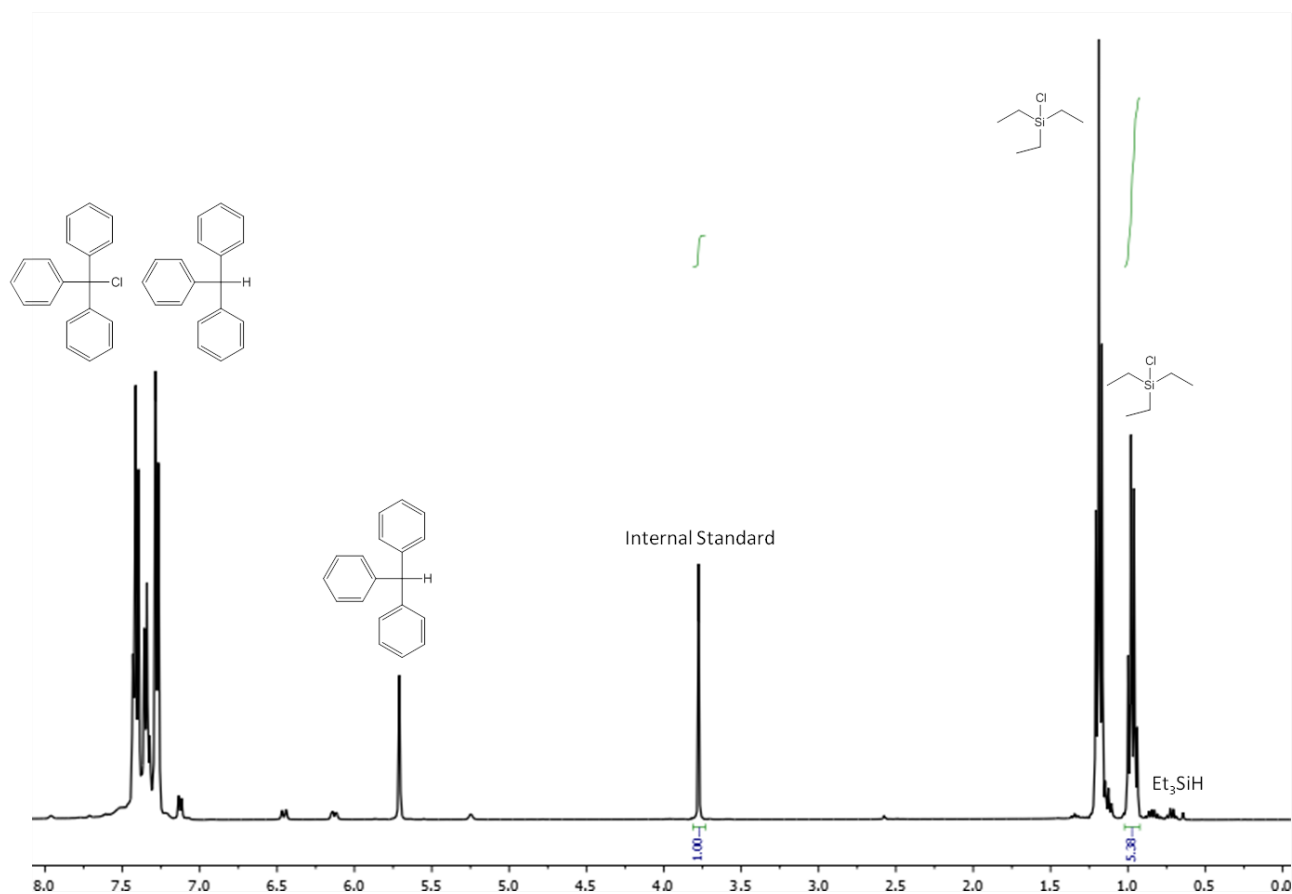

**Figure 7.**  $^1\text{H}$  NMR spectrum for the reaction of dechlorination of trityl chloride using  $\text{Et}_3\text{SiH}$ .

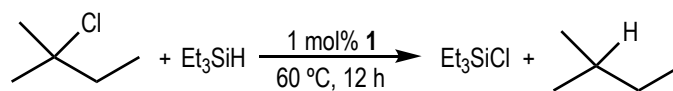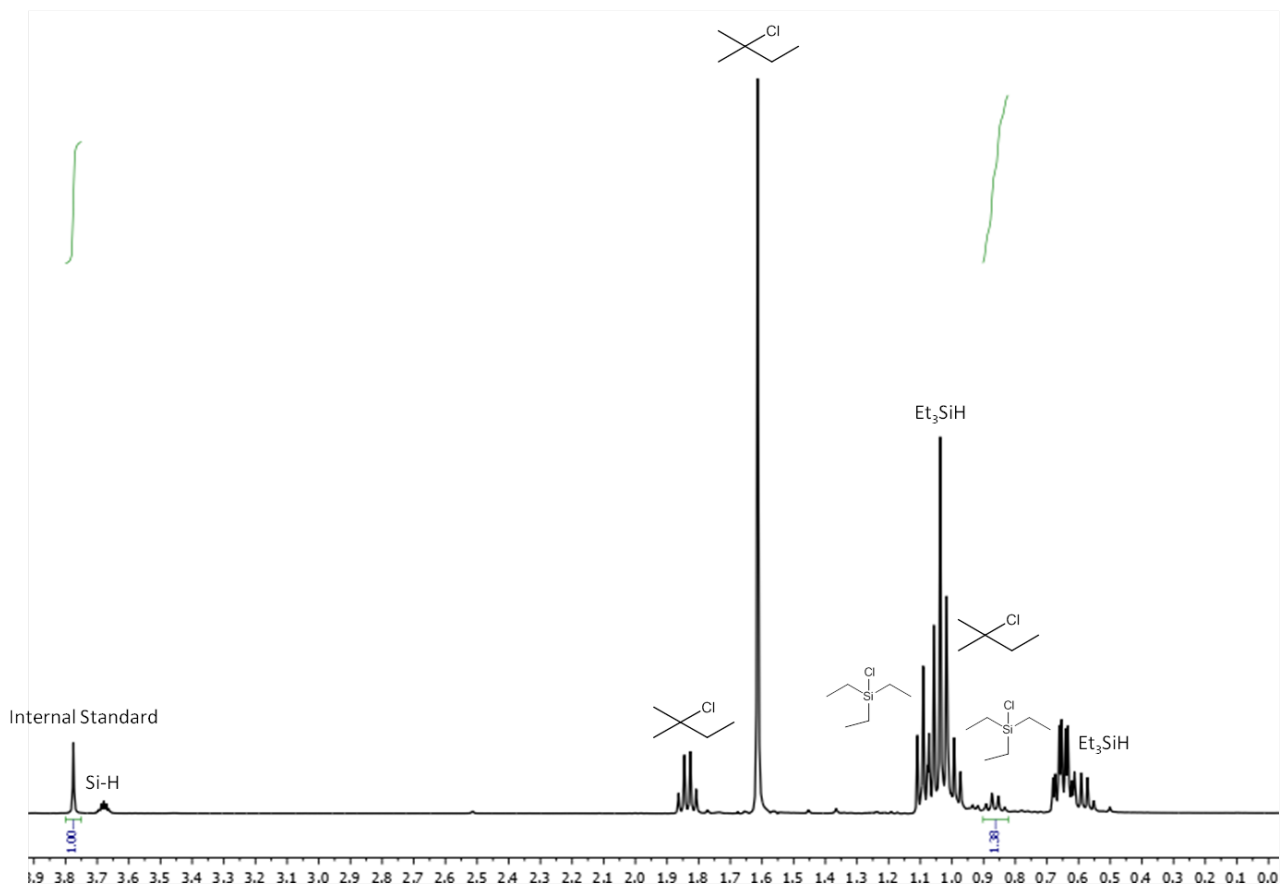

**Figure 8.**  $^1\text{H}$  NMR spectrum for the reaction of dechlorination of *tert*-pentyl chloride using Et<sub>3</sub>SiH.

## Dehalogenation of polychlorinated pesticides using Et<sub>3</sub>SiH

A Young flask charged with **1**, Et<sub>3</sub>SiH and 10 mg of the organochlorines (hexachlorocyclohexane isomers  $\alpha$ -,  $\beta$ -,  $\delta$ -,  $\gamma$ -HCH, 0.035 mmol); dichlorodiphenyldichloroethane isomers (2,4'- and 4,4'-DDD, 0.031 mmol); 4,4'-dichlorodiphenyltrichloroethane (DDT, 0.028 mmol); and methoxychlor, 0.29 mmol) was stirred up to 72 h at temperatures between 70 - 80 °C. After this time, 0.5 mL of CDCl<sub>3</sub> and 2 equivalents of dichloroethane (Internal Standard) were added and a <sup>1</sup>H NMR spectra was carried out at room temperature to calculate the conversion.

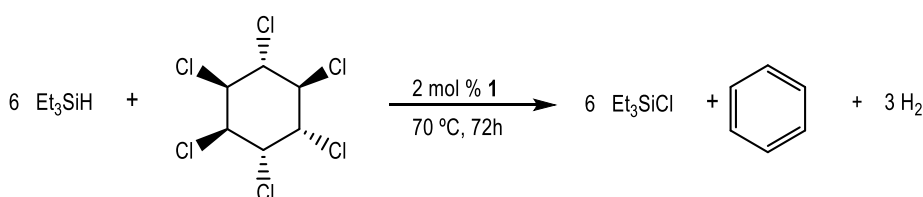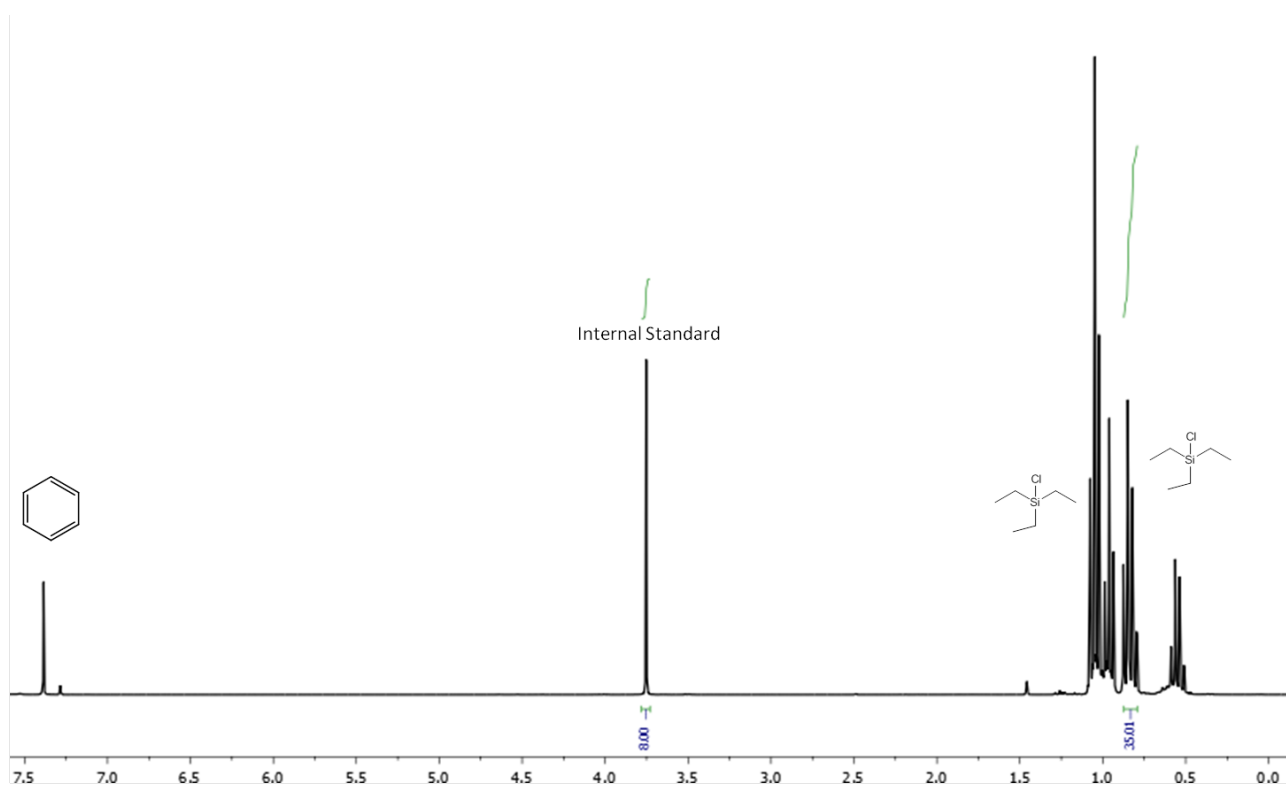

**Figure 9.** <sup>1</sup>H NMR spectrum for the reaction of dechlorination of  $\alpha$ -1,2,3,4,5,6-hexachlorocyclohexane using Et<sub>3</sub>SiH (50  $\mu$ L, 0.31 mmol) and **1** with a catalyst charge of 2 mol % (1,16 mg,  $6.95 \cdot 10^{-4}$  mmol) at 70 °C.

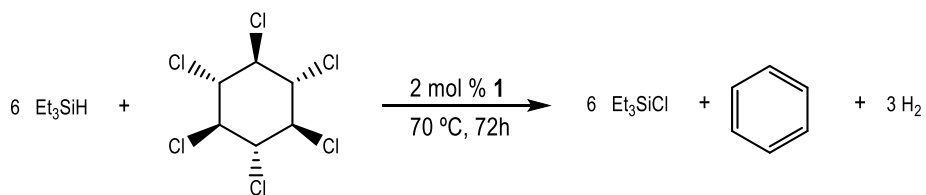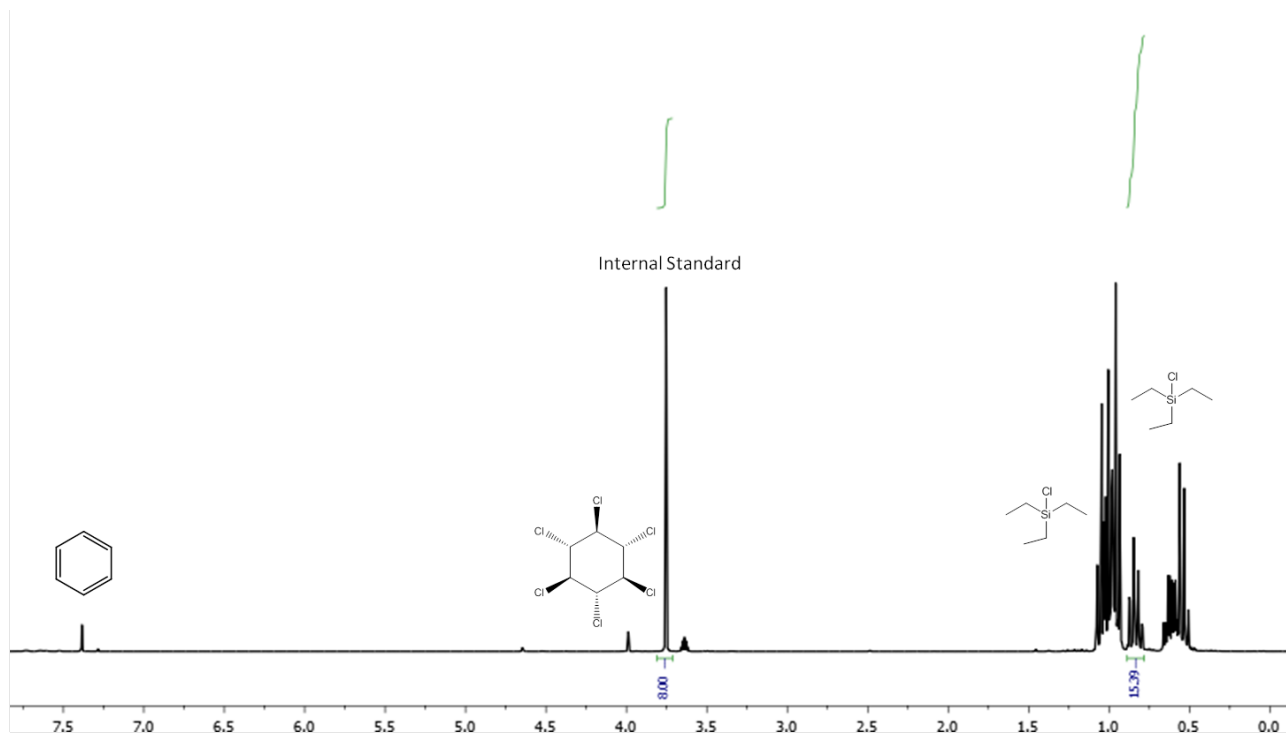

**Figure 10.**  $^1\text{H}$  NMR spectrum for the reaction of dechlorination of  $\beta$ -1,2,3,4,5,6-hexachlorocyclohexane using  $\text{Et}_3\text{SiH}$  (50  $\mu\text{L}$ , 0,31 mmol) and **1** with a catalyst charge of 2 mol % (1,16 mg,  $6.95 \cdot 10^{-4}$  mmol) at 70  $^\circ\text{C}$ .

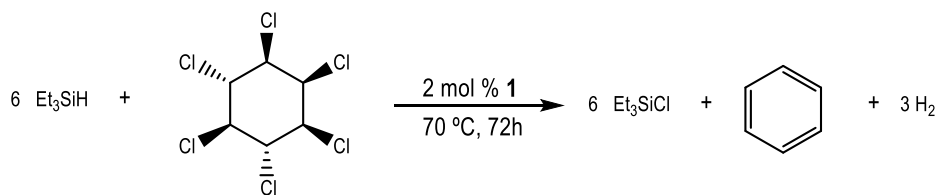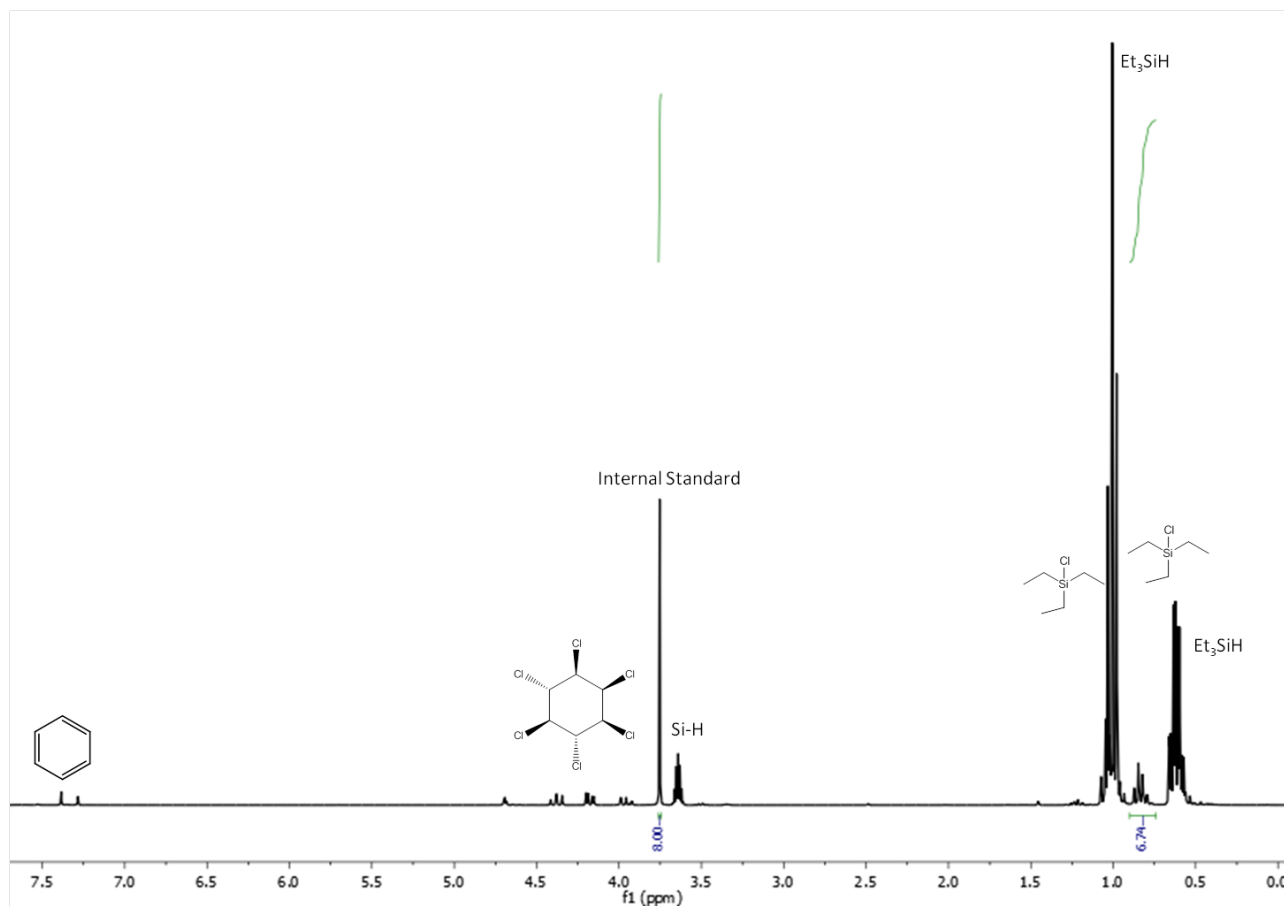

**Figure 11.**  $^1\text{H}$  NMR spectrum for the reaction of dechlorination of  $\delta$ -1,2,3,4,5,6-hexachlorocyclohexane using  $\text{Et}_3\text{SiH}$  (50  $\mu\text{L}$ , 0.31 mmol) and **1** with a catalyst charge of 2 mol % (1.16 mg,  $6.95 \cdot 10^{-4}$  mmol) at 70  $^\circ\text{C}$ .

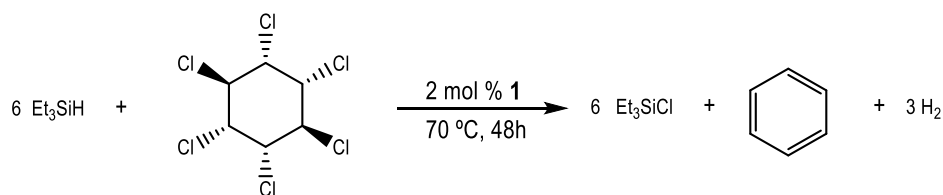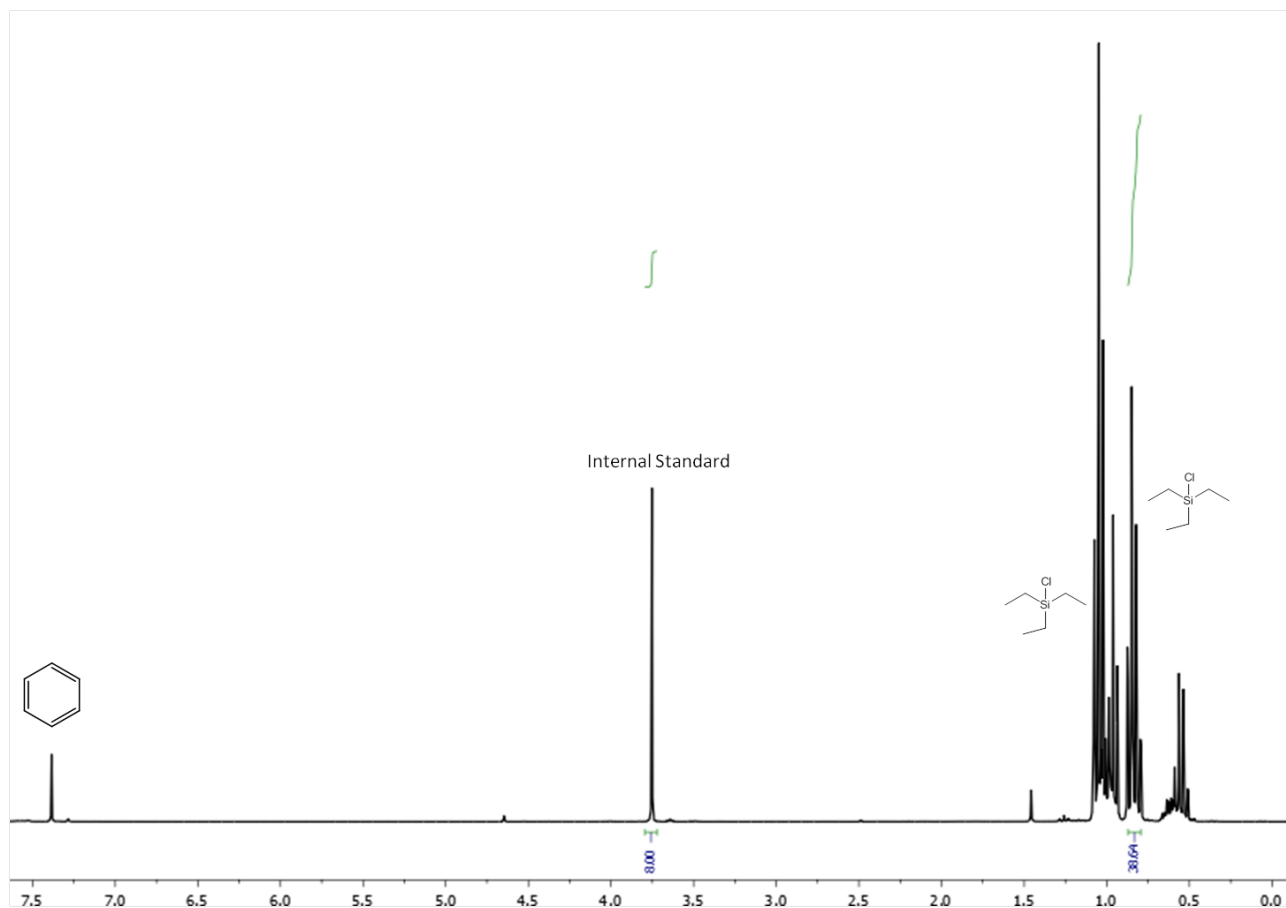

**Figure 12.**  $^1\text{H}$  NMR spectrum for the reaction of dechlorination of  $\gamma$ -1,2,3,4,5,6-hexachlorocyclohexane using  $\text{Et}_3\text{SiH}$  (50  $\mu\text{L}$ , 0,31 mmol) and **1** with a catalyst charge of 2 mol % (1,16 mg,  $6.95 \cdot 10^{-4}$  mmol) at  $70^\circ\text{C}$ .

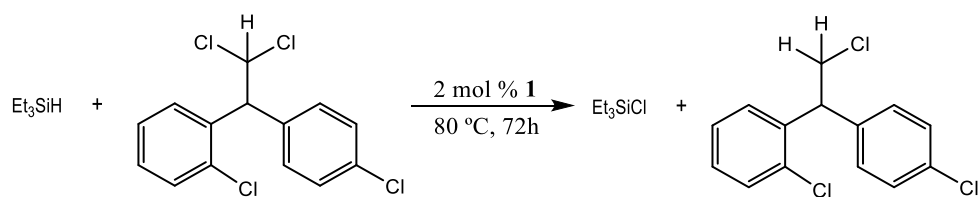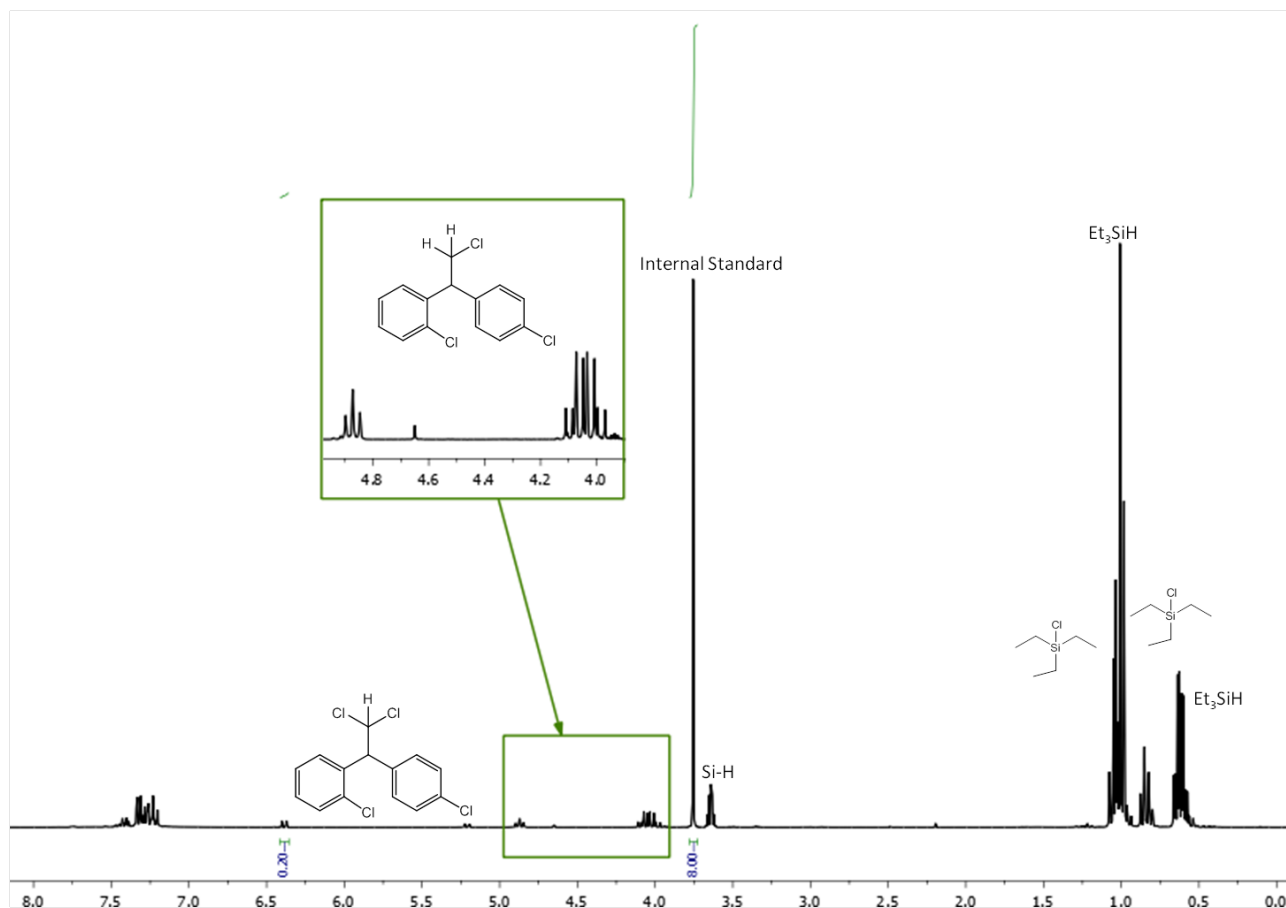

**Figure 13.**  $^1\text{H}$  NMR spectrum for the reaction of dechlorination of 2,4'-dichlorodiphenyldichloroethane (2,4'-DDD) using  $\text{Et}_3\text{SiH}$  (26  $\mu\text{L}$ , 0.16 mmol) and **1** with a catalyst charge of 2 mol % (1.05 mg,  $6.29 \cdot 10^{-4}$  mmol) at 80  $^\circ\text{C}$ .

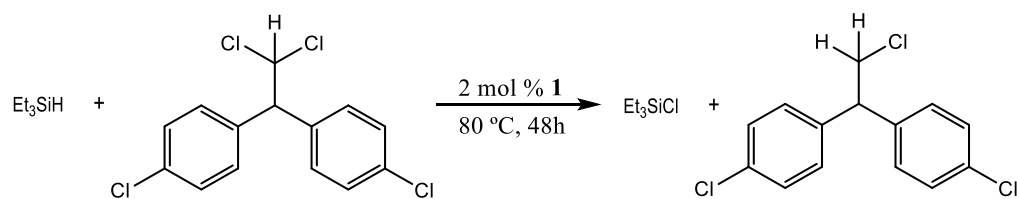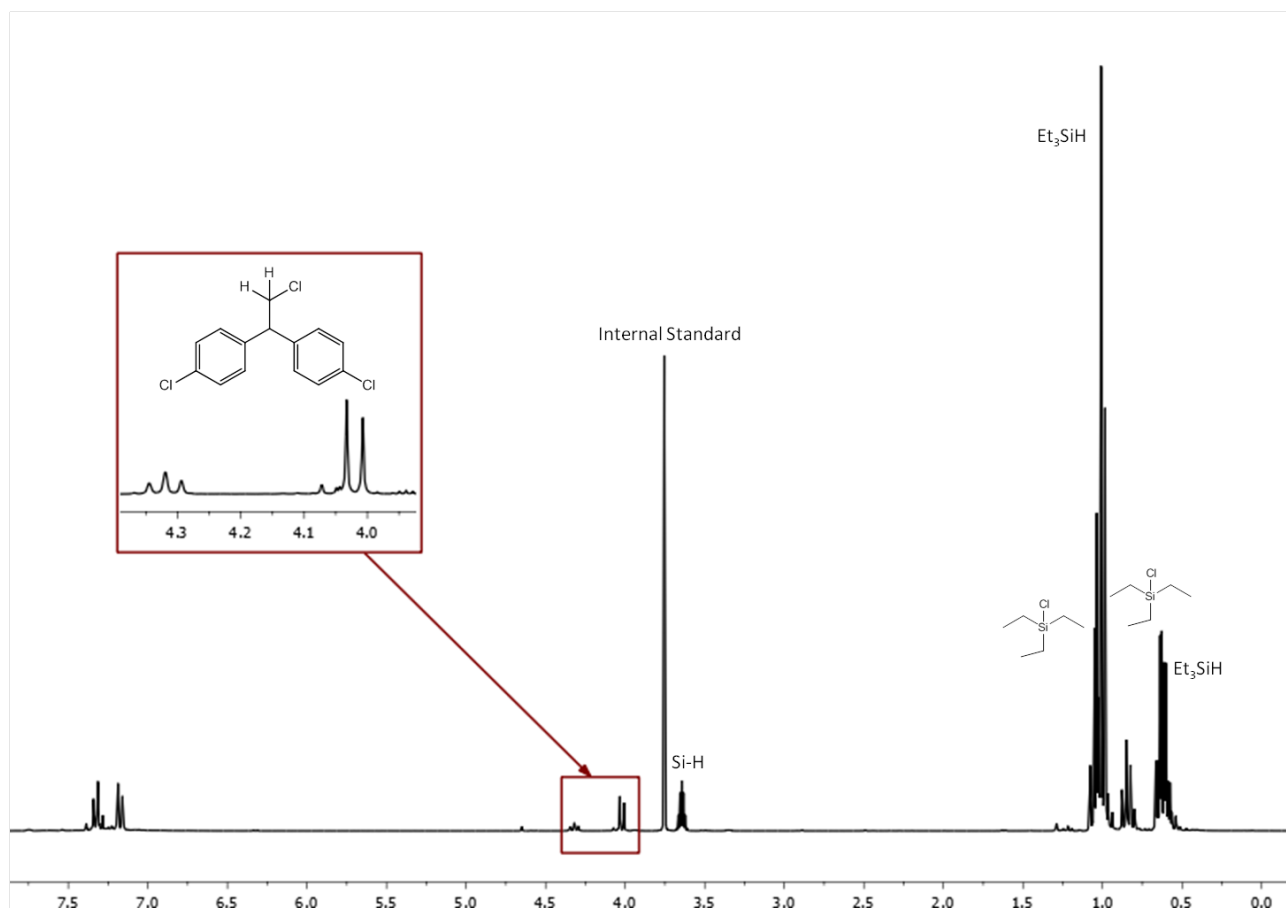

**Figure 14.**  $^1\text{H}$  NMR spectrum for the reaction of dechlorination of 4,4'-dichlorodiphenyldichloroethane (4,4'-DDD) using  $\text{Et}_3\text{SiH}$  (26  $\mu\text{L}$ , 0.16 mmol) and **1** with a catalyst charge of 2 mol % (1.05 mg,  $6.29 \cdot 10^{-4}$  mmol) at 80 °C.

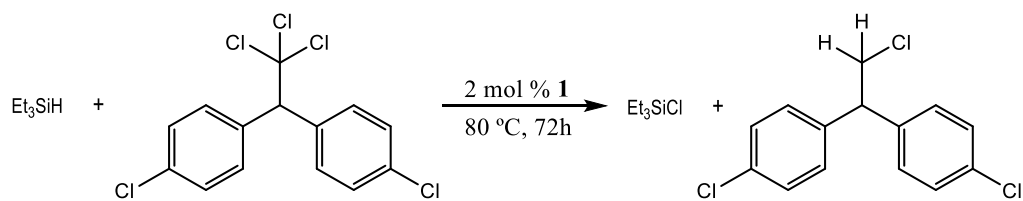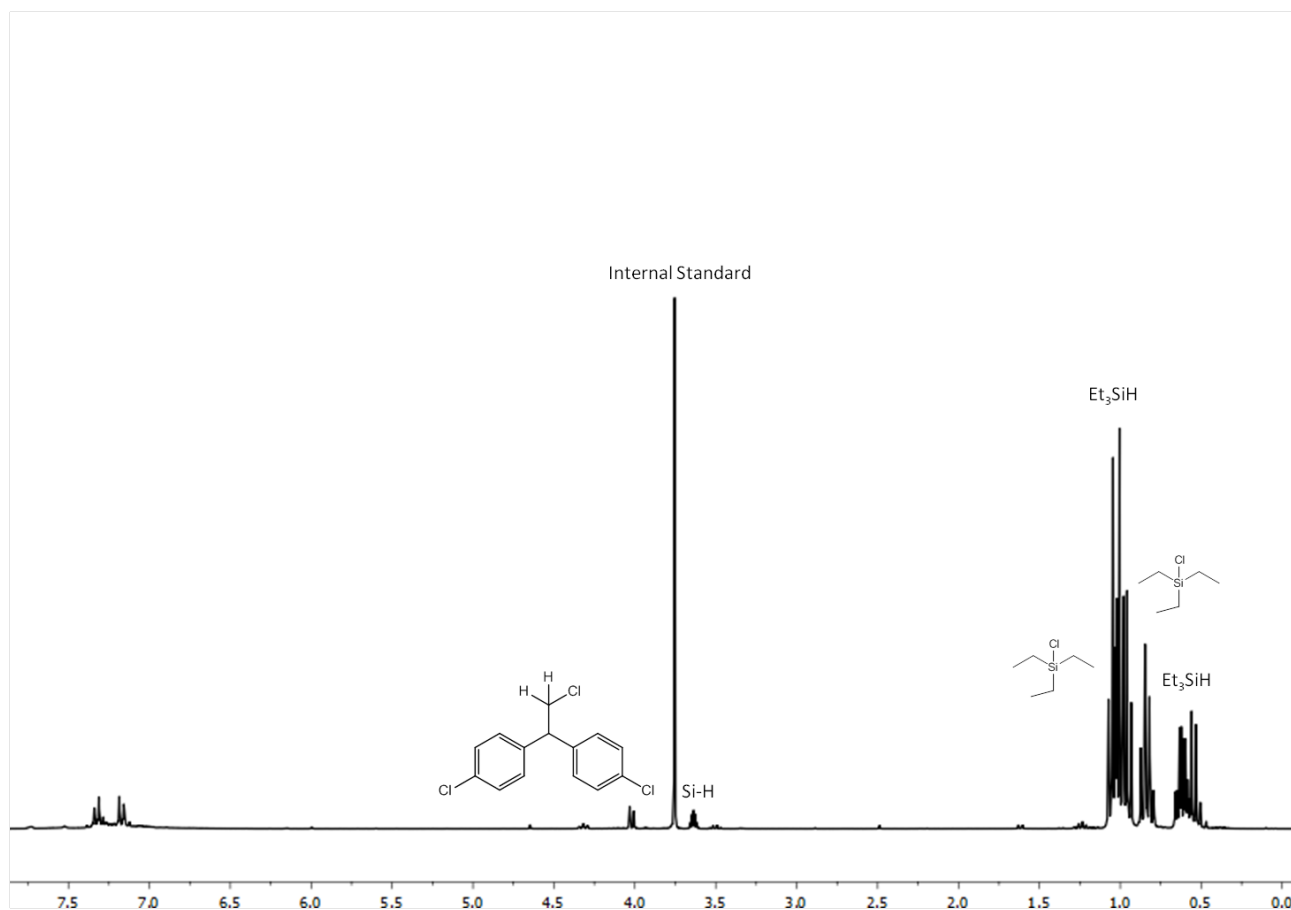

**Figure 15.**  $^1\text{H}$  NMR spectrum for the reaction of dechlorination of 4,4'-dichlorodiphenyltrichloroethane (DDT) using  $\text{Et}_3\text{SiH}$  (27  $\mu\text{L}$ , 0,17 mmol) and **1** with a catalyst charge of 2 mol % (0,94 mg,  $5.64 \cdot 10^{-4}$  mmol) at 80 °C.

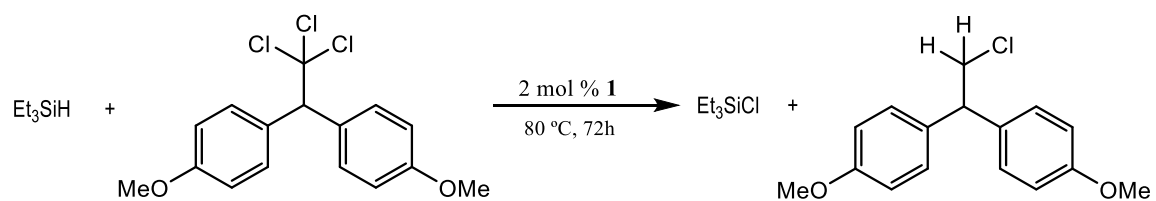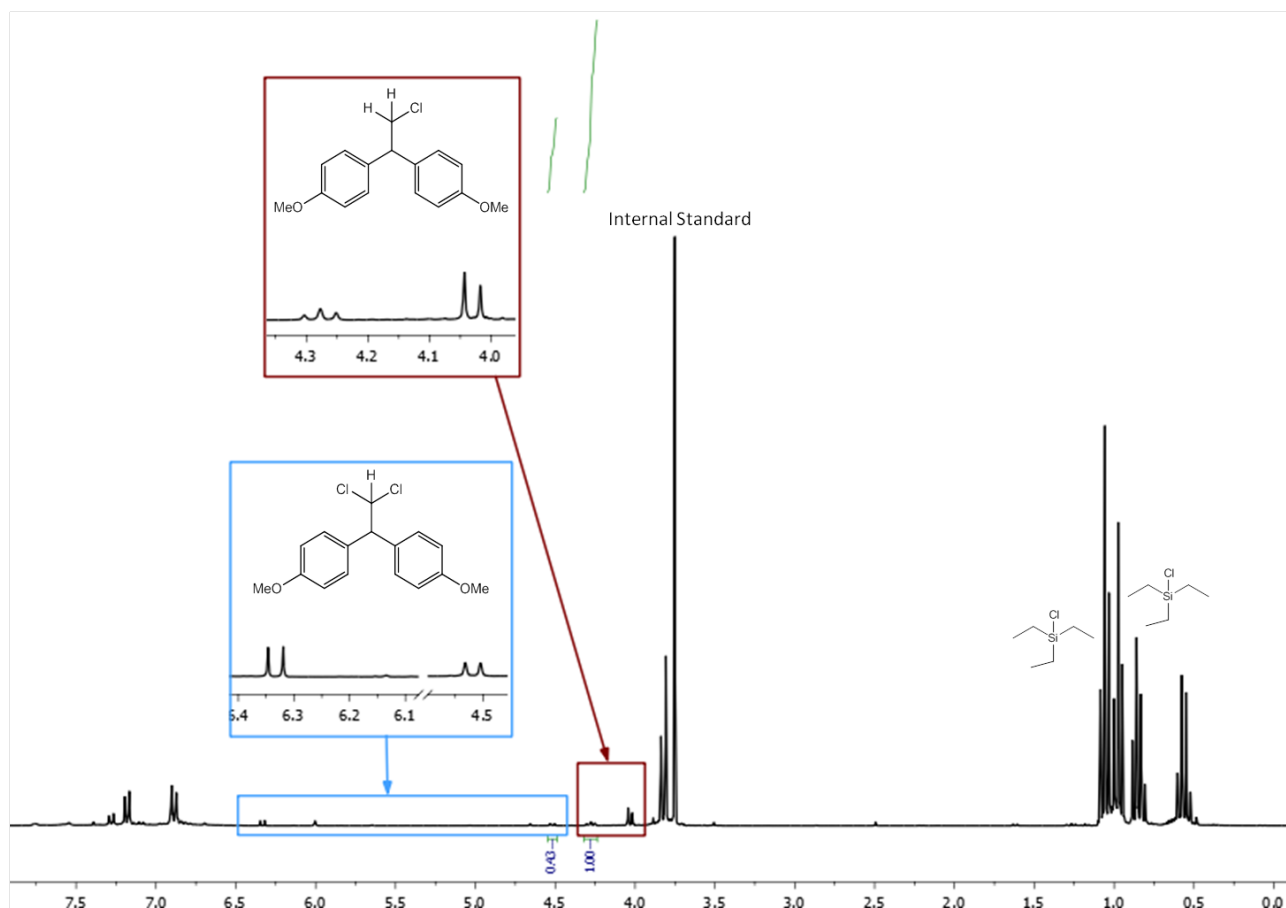

**Figure 16.**  $^1\text{H}$  NMR spectrum for the reaction of dechlorination of methoxychlor using  $\text{Et}_3\text{SiH}$  (19  $\mu\text{L}$ , 0.12 mmol) and **1** with a catalyst charge of 2 mol % (0.97 mg,  $5.79 \cdot 10^{-4}$  mmol) at 80  $^\circ\text{C}$ .

### Dehalogenation of $\text{CDCl}_3$ using $\text{Et}_3\text{SiH}$ at different temperatures

To a solution of **1** (4.2mg, 0.0025 mmol) in  $\text{CDCl}_3$  (0.5 mL) charged in a J. Young NMR tube was added triethylsilane ( $\text{Et}_3\text{SiH}$  40  $\mu\text{L}$ , 0.25 mmol). The solution was monitored by  $^1\text{H}$  NMR at 40°C, following the disappearance of the hydrosilane resonance and the appearance of new chlorosilane and  $\text{CHDCl}_2$ . This experiment was repeated at different temperatures (45 °C, 50 °C and 55 °C).

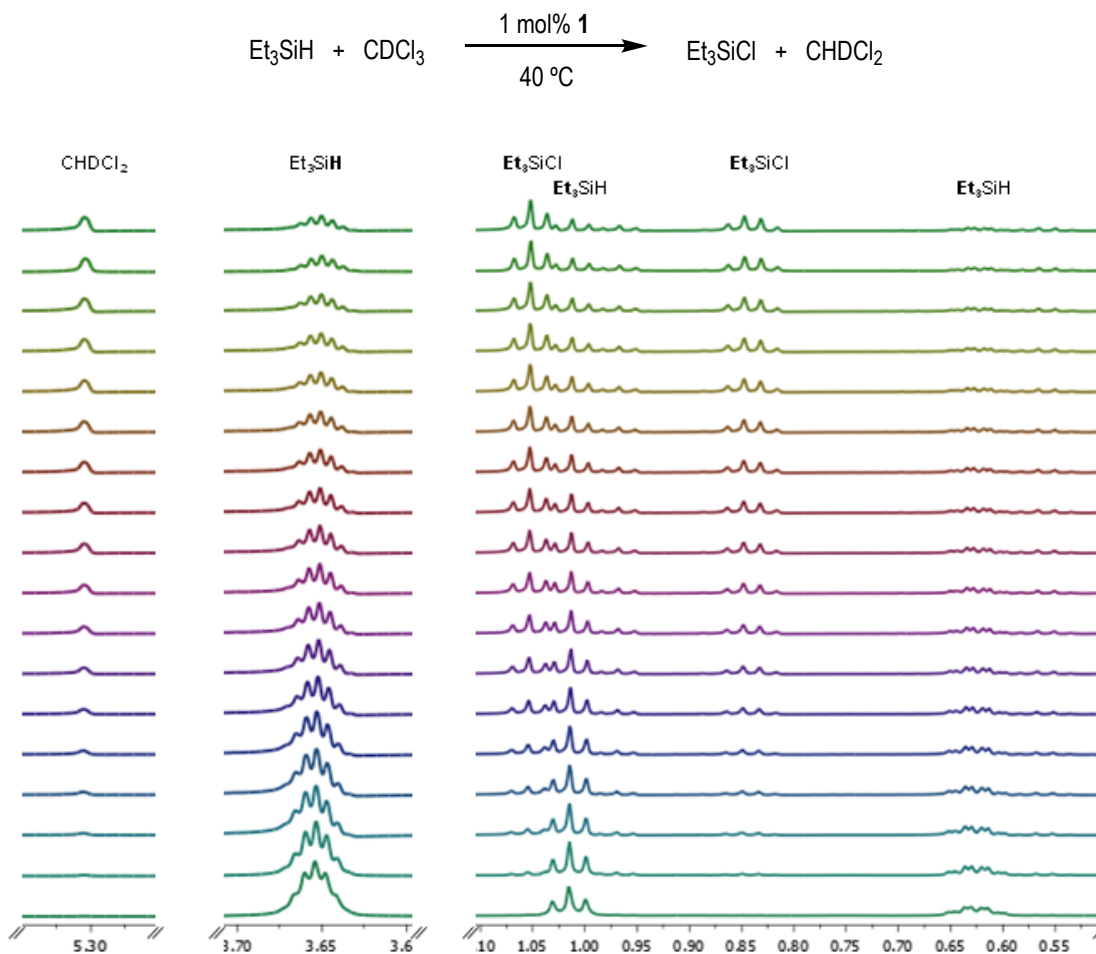

**Figure 17.** Dechlorination of  $\text{CDCl}_3$  using  $\text{Et}_3\text{SiH}$ . Reaction monitoring by  $^1\text{H}$  NMR at 40 °C.

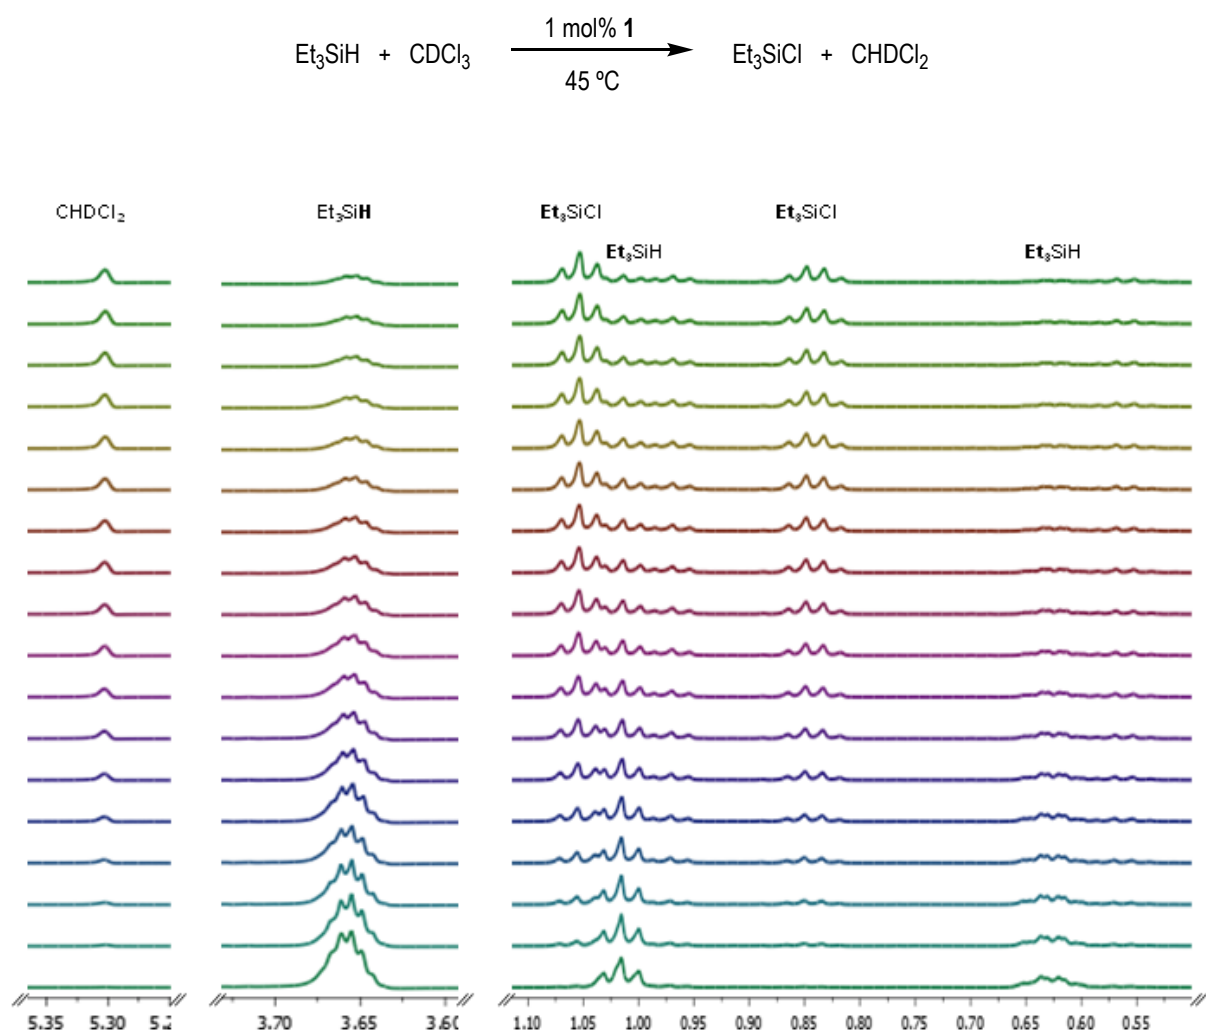

**Figure 18.** Dechlorination of CDCl<sub>3</sub> using Et<sub>3</sub>SiH. Reaction monitoring by <sup>1</sup>H NMR at 45 °C.

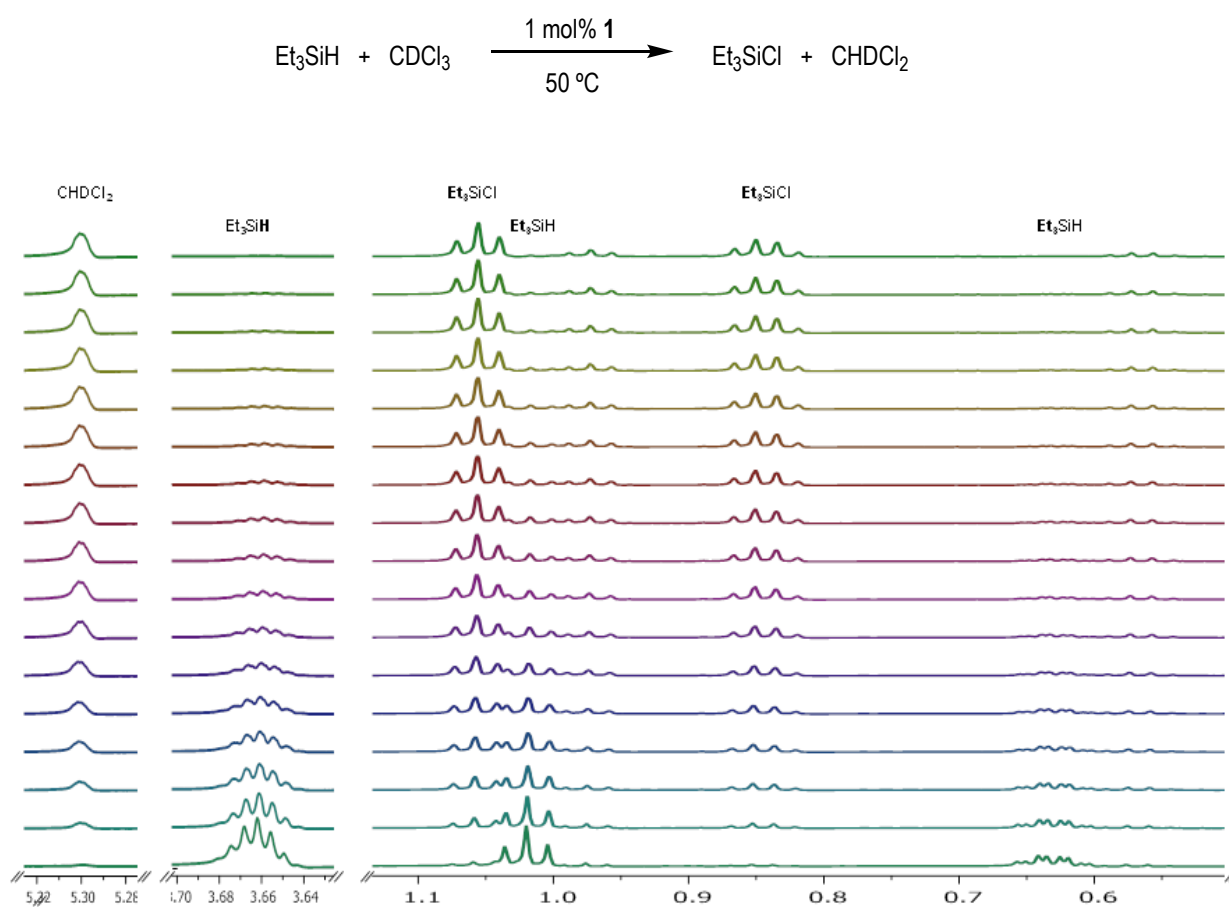

**Figure 19.** Dechlorination of CDCl<sub>3</sub> using Et<sub>3</sub>SiH. Reaction monitoring by <sup>1</sup>H NMR at 50 °C.

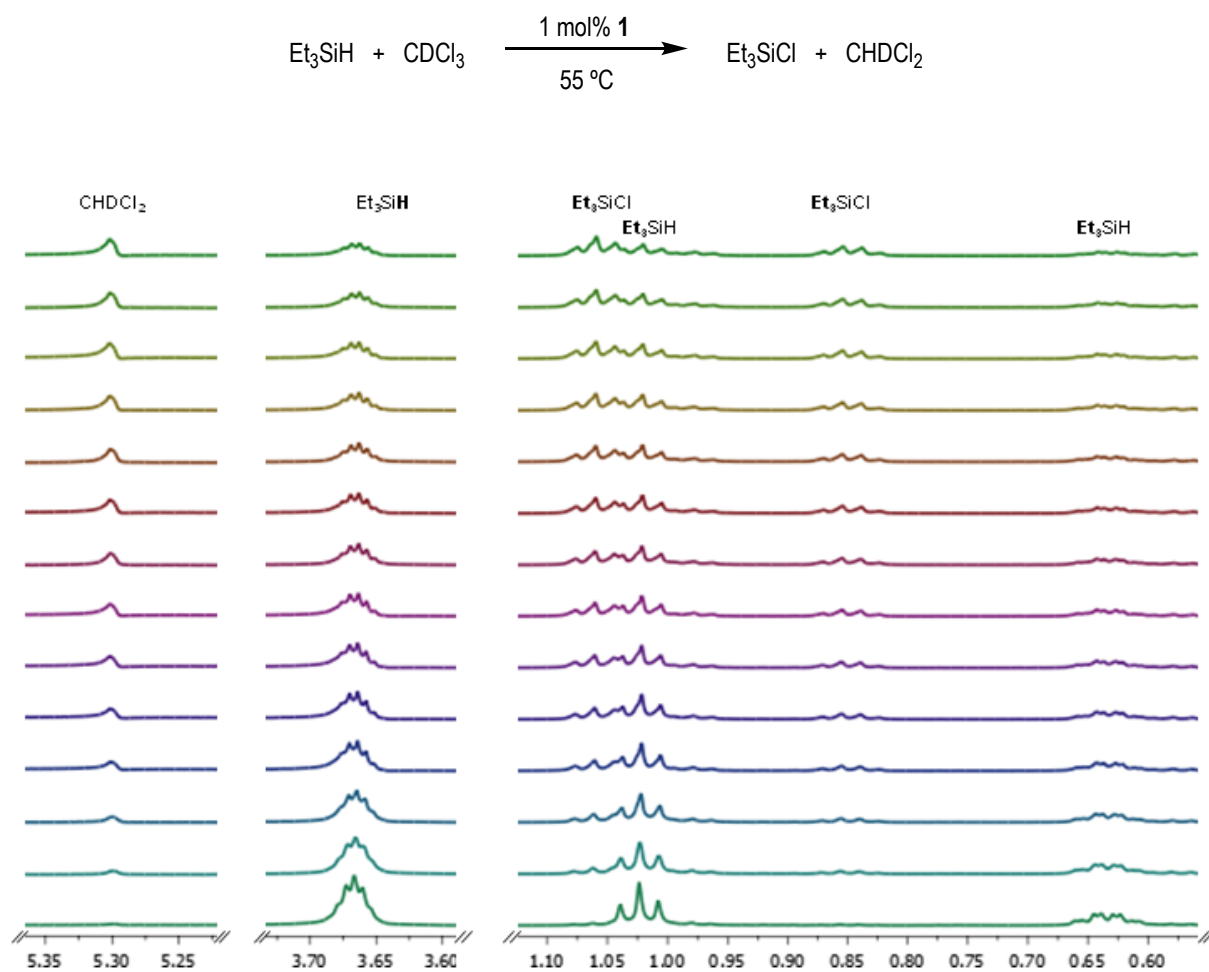

**Figure 20.** Dechlorination of CDCl<sub>3</sub> using Et<sub>3</sub>SiH. Reaction monitoring by  $^1\text{H}$  NMR at 55 °C.

### Dehalogenation of $\text{CDCl}_3$ using $\text{Et}_3\text{SiD}$ (KIE)

To a solution of **1** (4.2mg, 0.0025 mmol) in  $\text{CDCl}_3$  (0.5 mL) charged in a J. Young NMR tube was added  $\text{Et}_3\text{SiD}$  (40  $\mu\text{L}$ , 0.25 mmol). The solution was monitored by  $^1\text{H}$  NMR at  $40^\circ\text{C}$ , following the disappearance of the hydrosilane resonance and the appearance of new chlorosilane

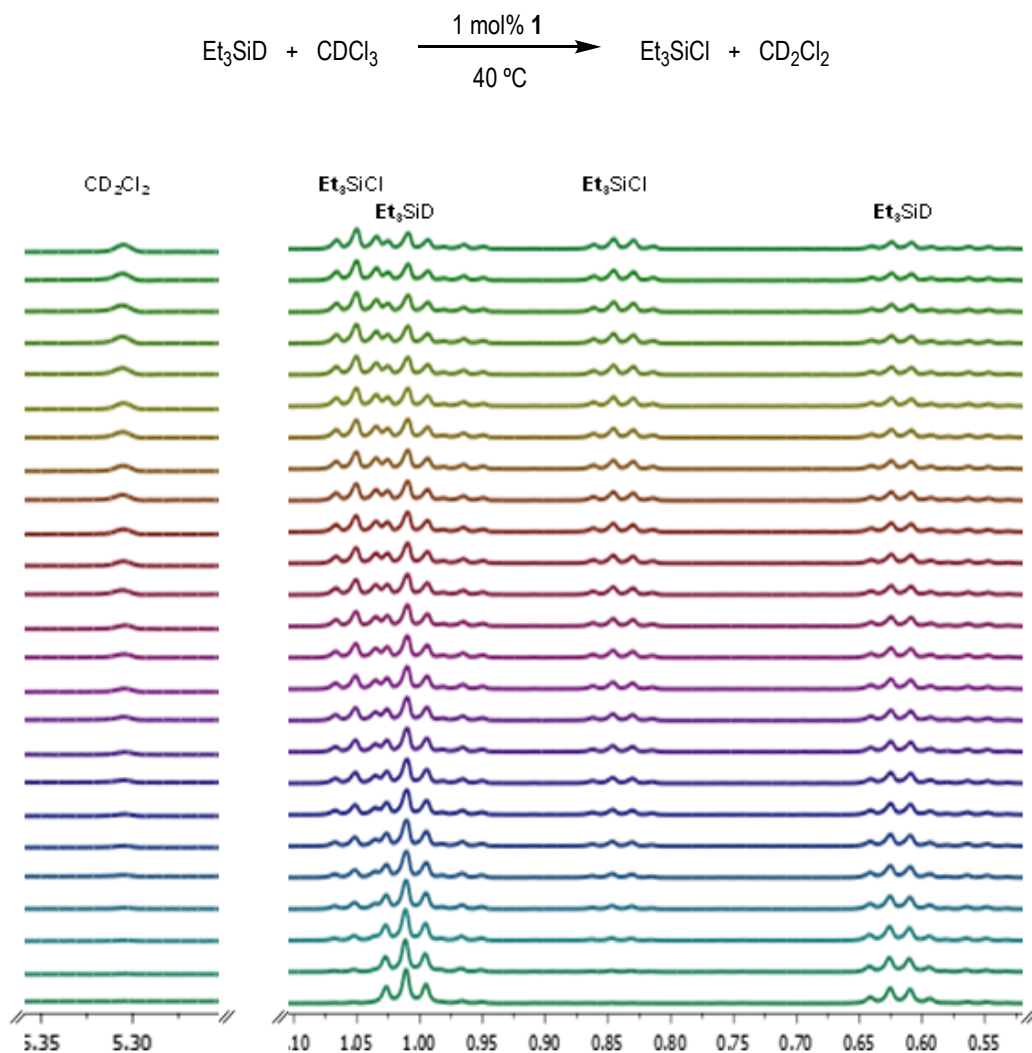

**Figure 21.** Dechlorination of  $\text{CDCl}_3$  using  $\text{Et}_3\text{SiD}$ . Reaction monitoring by  $^1\text{H}$  NMR at  $40^\circ\text{C}$ .

## Dehalogenation of CDBr<sub>3</sub> using Et<sub>3</sub>SiH

To a solution of **1** (4.2mg, 0.0025 mmol) in CDBr<sub>3</sub> (0.5 mL) charged in a J. Young NMR tube was added a triethylsilane (Et<sub>3</sub>SiH 40  $\mu$ L, 0.25 mmol). The solution was monitored by <sup>1</sup>H NMR at 40°C, following the disappearance of the hydrosilane resonance and the appearance of new bromosilane.

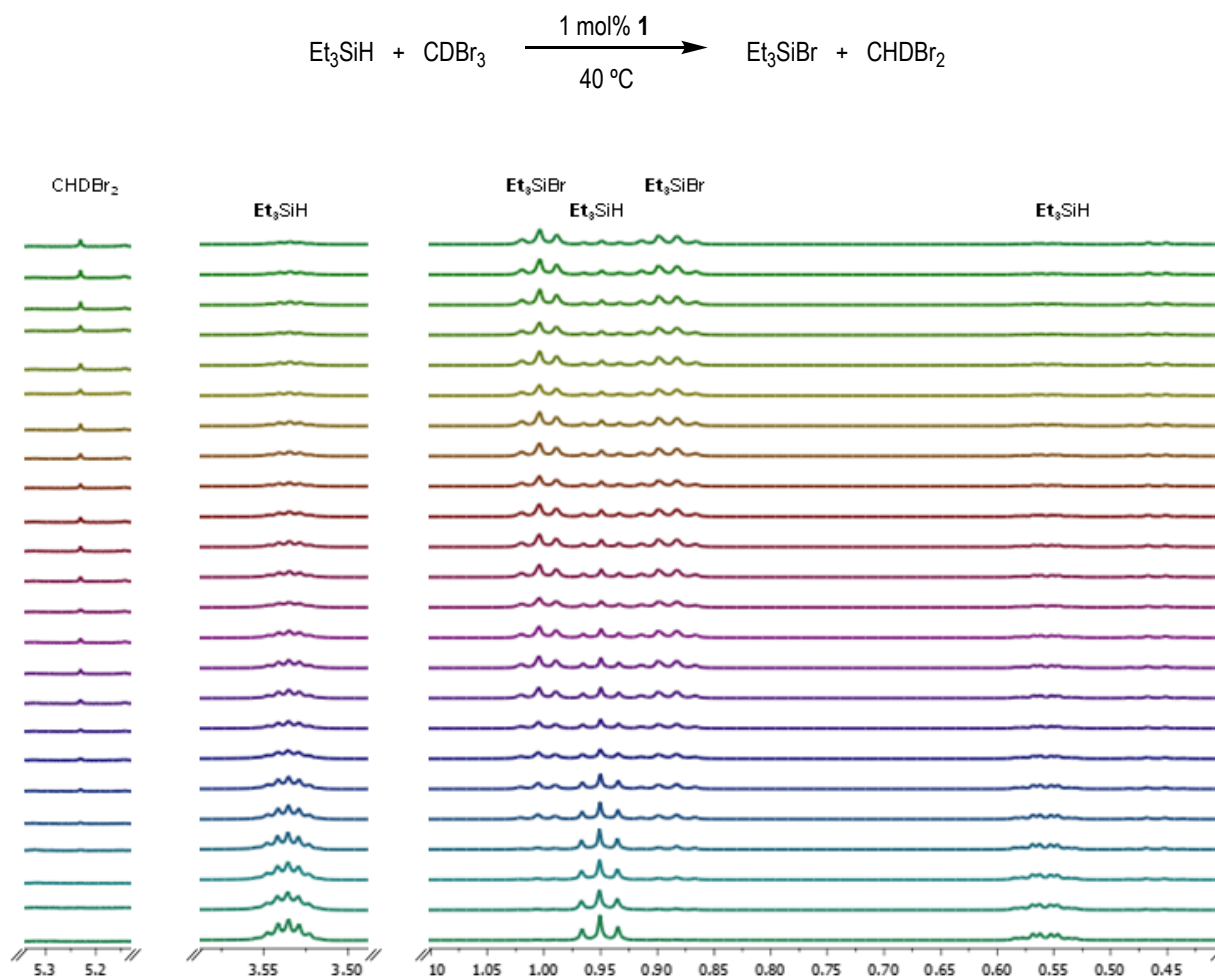

**Figure 22.** Debromination of CDBr<sub>3</sub> using Et<sub>3</sub>SiH. Reaction monitoring by <sup>1</sup>H NMR at 40 °C.

Triethylbromosilane: <sup>1</sup>H NMR (500 MHz, CDCl<sub>3</sub>):  $\delta$  1.00 (t, J = 7.6 Hz, 9H), 0.89 (q, J = 8.7, 7.7 Hz, 6H).

### Dehalogenation of $\text{CDCl}_3$ using $\text{Et}_3\text{SiH}$ and $\text{PPh}_3$

To a solution of **1** (4.2 mg, 0.0025 mmol) and  $\text{PPh}_3$  (1 mg, 0.0038 mmol) in  $\text{CDCl}_3$  (0.5 mL) charged in a J. Young NMR tube was added  $\text{Et}_3\text{SiH}$  (40  $\mu\text{L}$ , 0.25 mmol). The solution was monitored by  $^1\text{H}$  NMR at  $50^\circ\text{C}$ , following the disappearance of the hydrosilane resonance and the appearance of new chlorosilane.

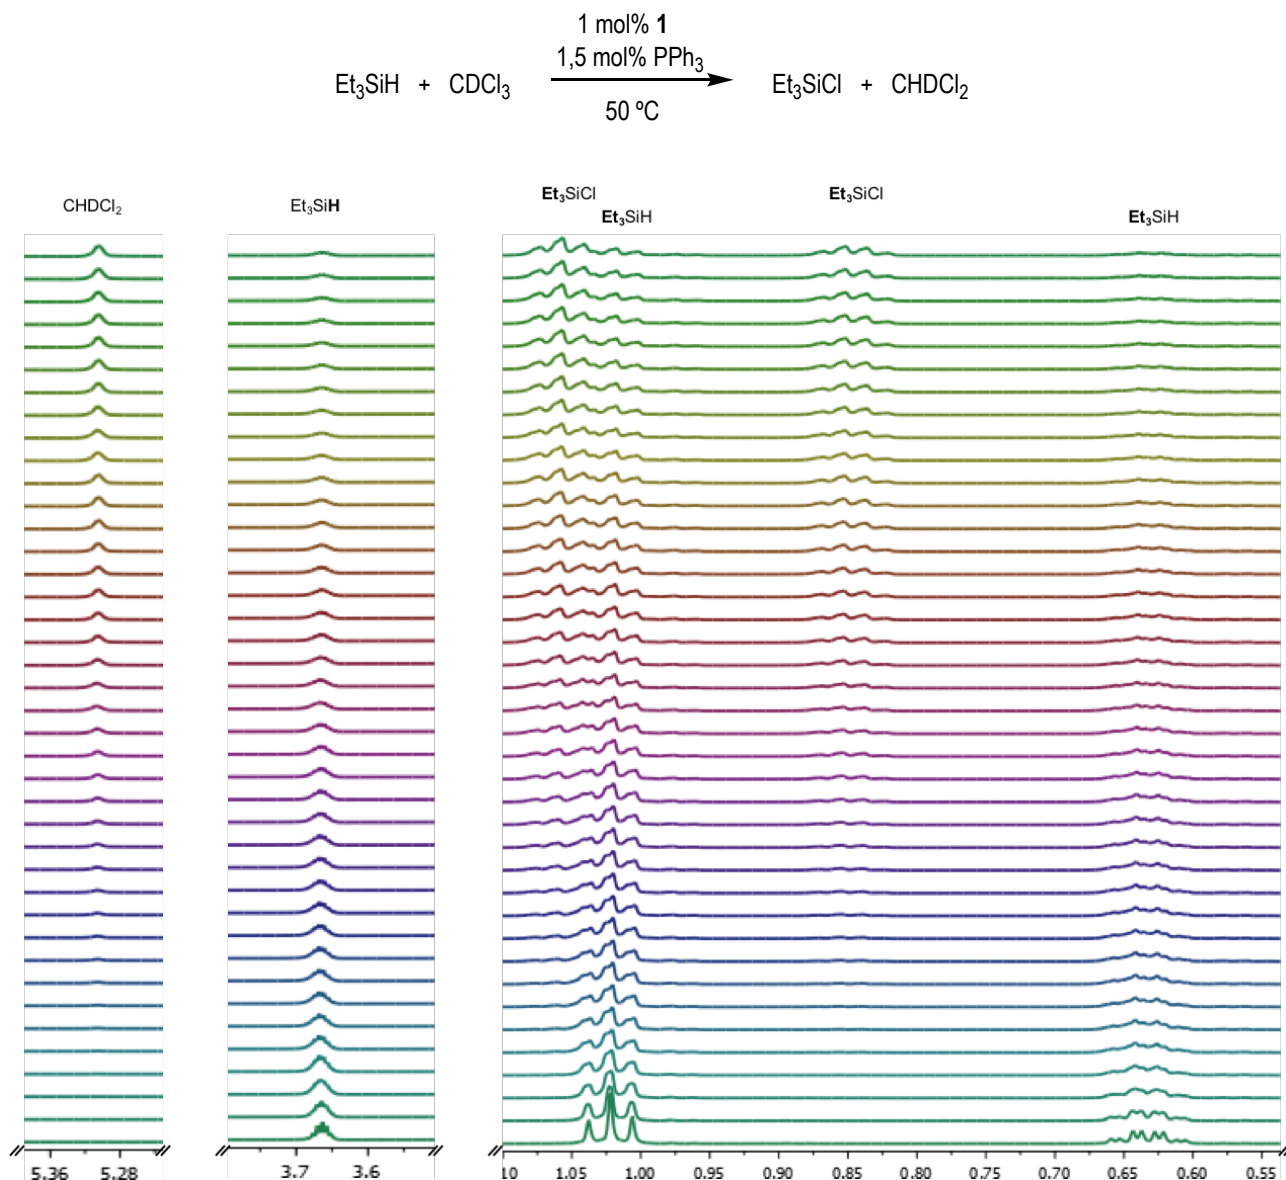

**Figure 23.** Dechlorination of  $\text{CDCl}_3$  using  $\text{Et}_3\text{SiH}$  and 1.5 mol% of  $\text{PPh}_3$ . Reaction monitoring by  $^1\text{H}$  NMR at  $50^\circ\text{C}$ .

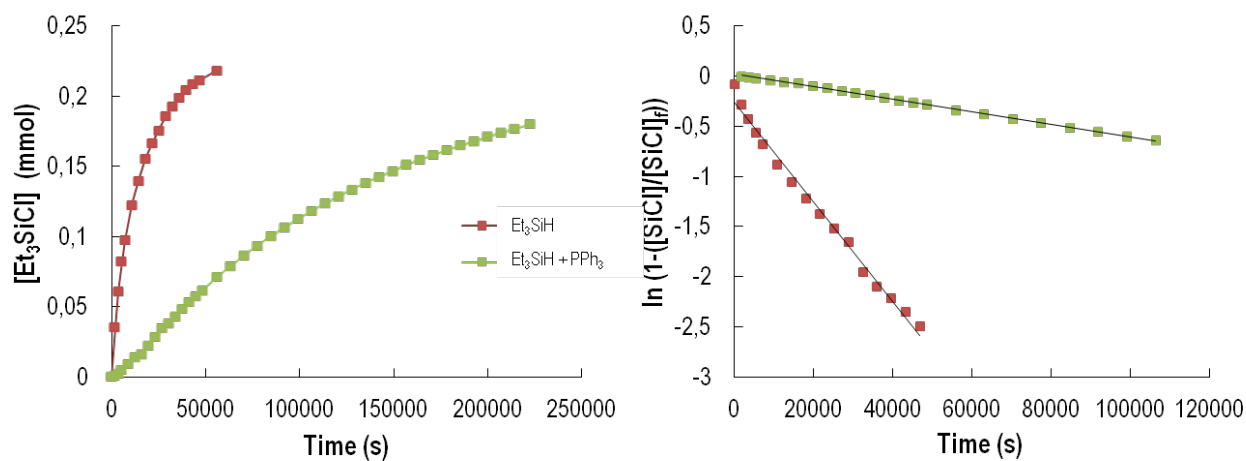

**Figure 24.** Concentration of  $\text{Et}_3\text{SiCl}$  vs time and first order plots for the dechlorination of  $\text{CDCl}_3$  using  $\text{Et}_3\text{SiH}$  with and without  $\text{PPh}_3$ .

### Dehalogenation of $\text{CDCl}_3$ using $\text{Et}_3\text{SiH}$ under $\text{H}_2$ atmosphere.

A J. Young NMR tube charged with **1** (4.2 mg, 0.0025 mmol),  $\text{CDCl}_3$  (0.5 mL) and  $\text{Et}_3\text{SiH}$  (40  $\mu\text{L}$ , 0.25 mmol) was placed under 1 atm. of  $\text{H}_2$ . The solution was monitored by  $^1\text{H}$  NMR at  $50^\circ\text{C}$ , following the disappearance of the hydrosilane resonance and the appearance of new chlorosilane.

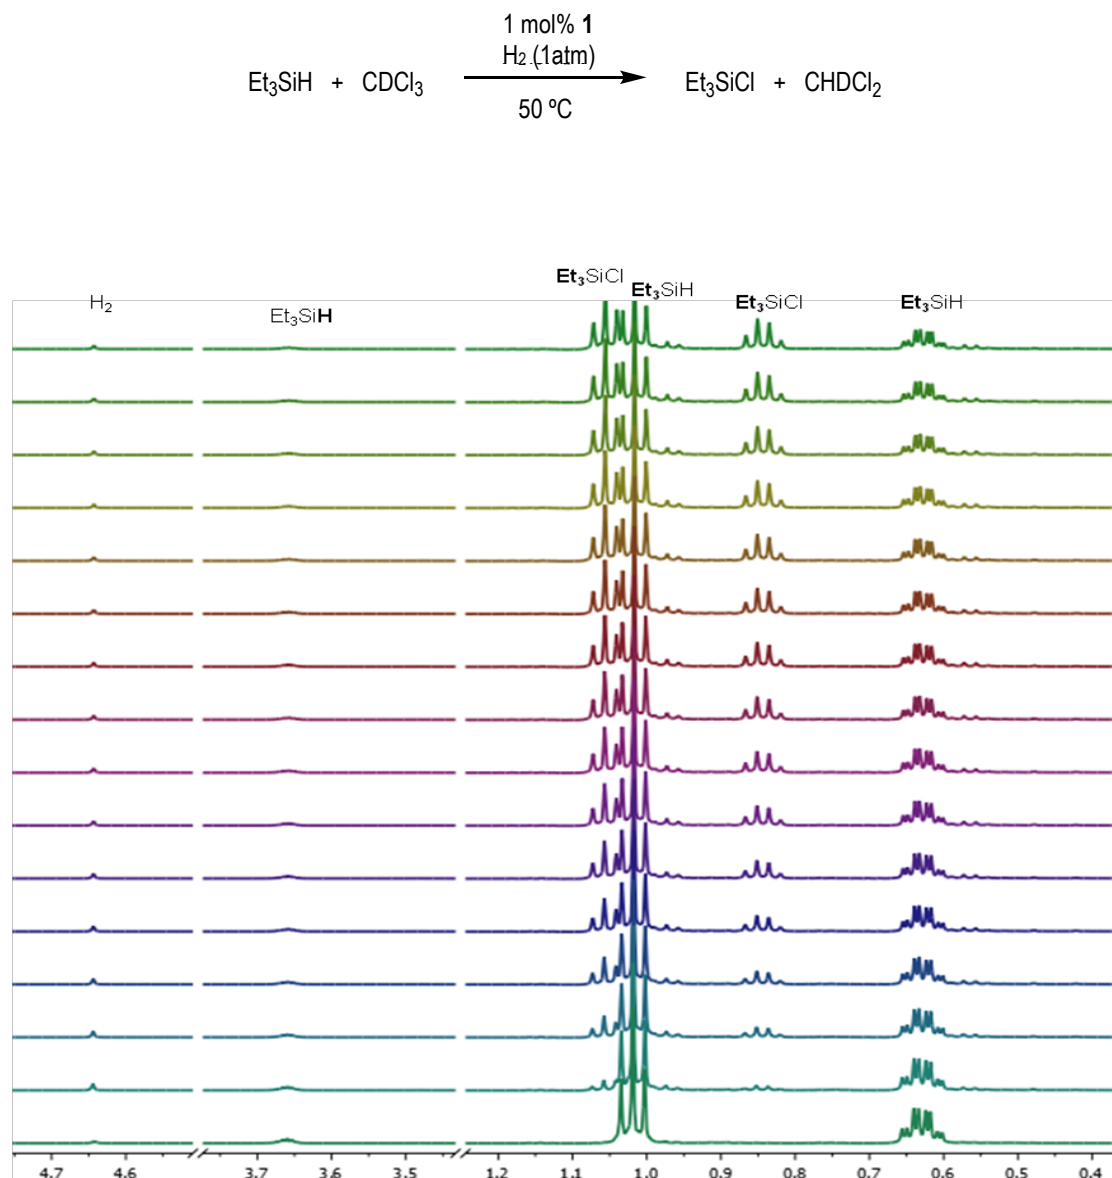

**Figure 25.** Dechlorination of  $\text{CDCl}_3$  using  $\text{Et}_3\text{SiH}$  under 1 atm of  $\text{H}_2$ . Reaction monitoring by  $^1\text{H}$  NMR at  $50^\circ\text{C}$ .

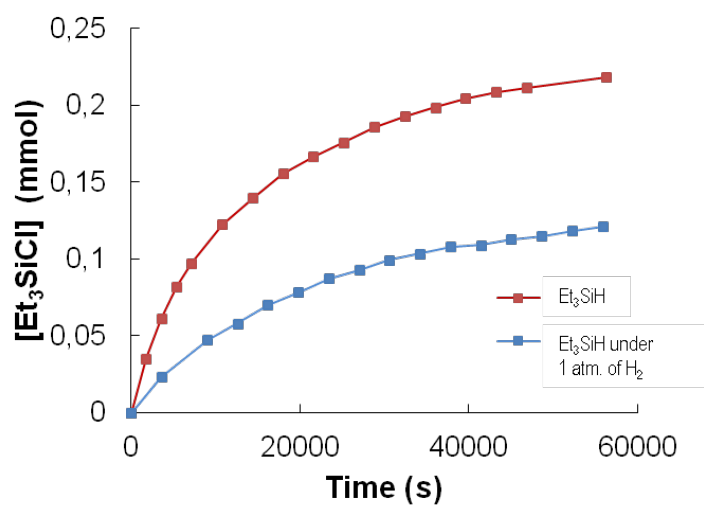

**Figure 26.** Concentration of  $\text{Et}_3\text{SiCl}$  vs time for the dechlorination of  $\text{CDCl}_3$  using  $\text{Et}_3\text{SiH}$  and under  $\text{H}_2$  atmosphere.

## Control experiment

A solution of **1** (20 mg, 0.012 mmol) in  $\text{CDCl}_3$  (5 mL) in a J. Young NMR tube was monitored by  $^1\text{H}$  NMR observing that after 16 h *NO REACTION* was observed.

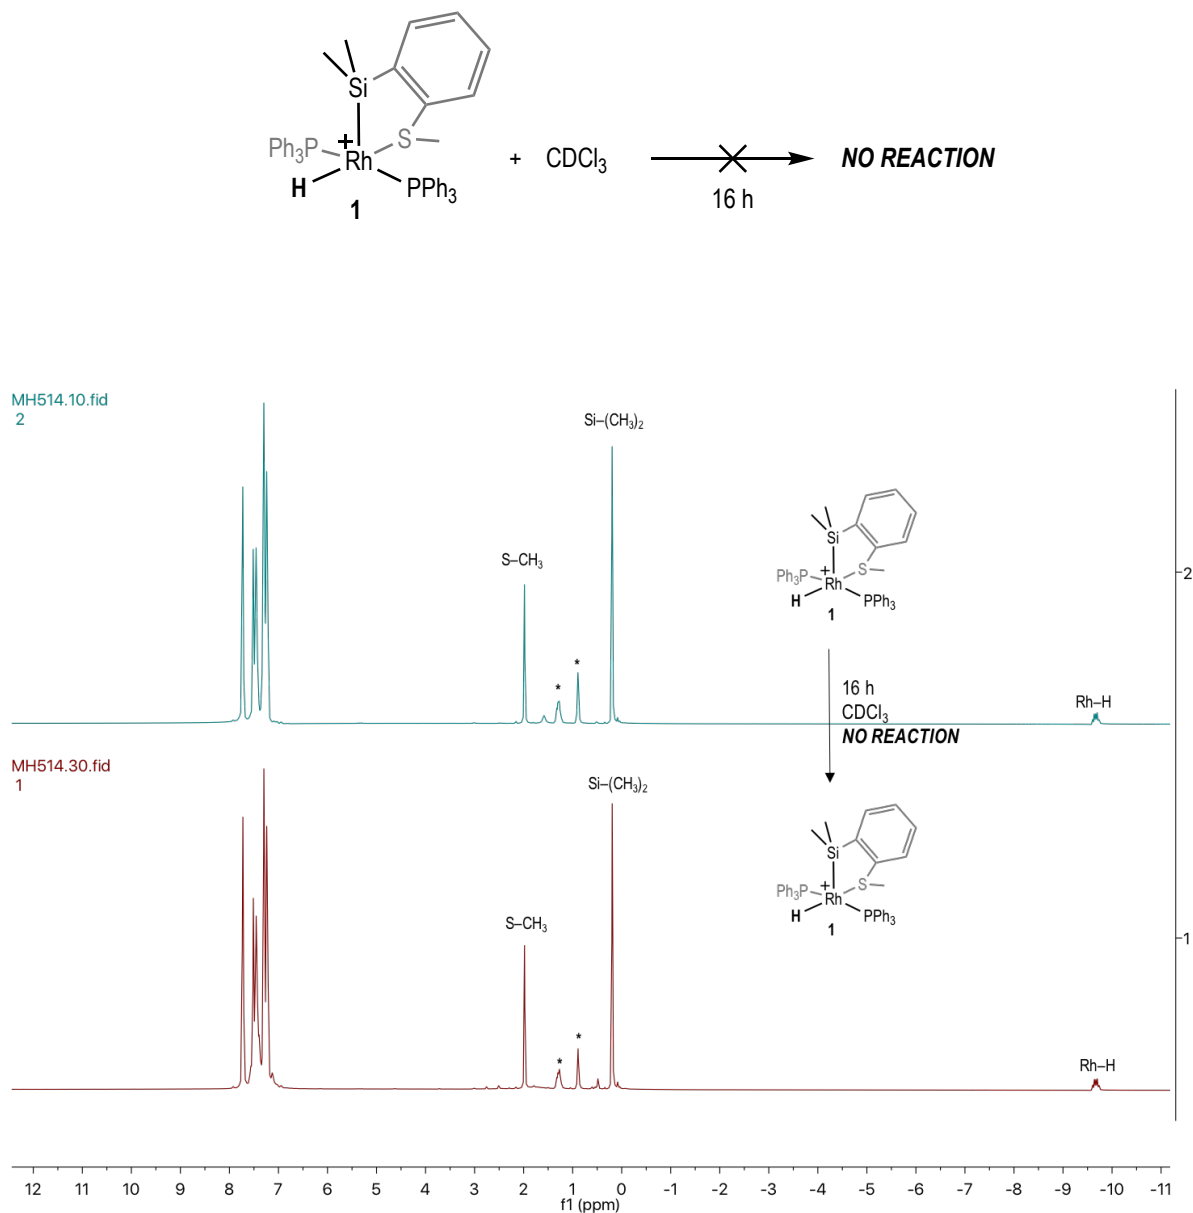

**Figure 27.**  $^1\text{H}$  NMR spectrum of **1** in  $\text{CDCl}_3$  after 10 minutes (top) and after 16 hours (bottom). (\*) pentane

## H/D Exchange experiment

A solution of **1** (20 mg, 0.012 mmol) in  $\text{CD}_2\text{Cl}_2$  (5 mL) in a J. Young NMR tube was added  $\text{Et}_3\text{SiD}$  (2  $\mu\text{L}$ , 0.012 mmol), after 15 minutes of reaction the  $^1\text{H}$  NMR shows the formation of a 20 % of  $\text{Et}_3\text{SiH}$  demonstrating the H/D interchange.

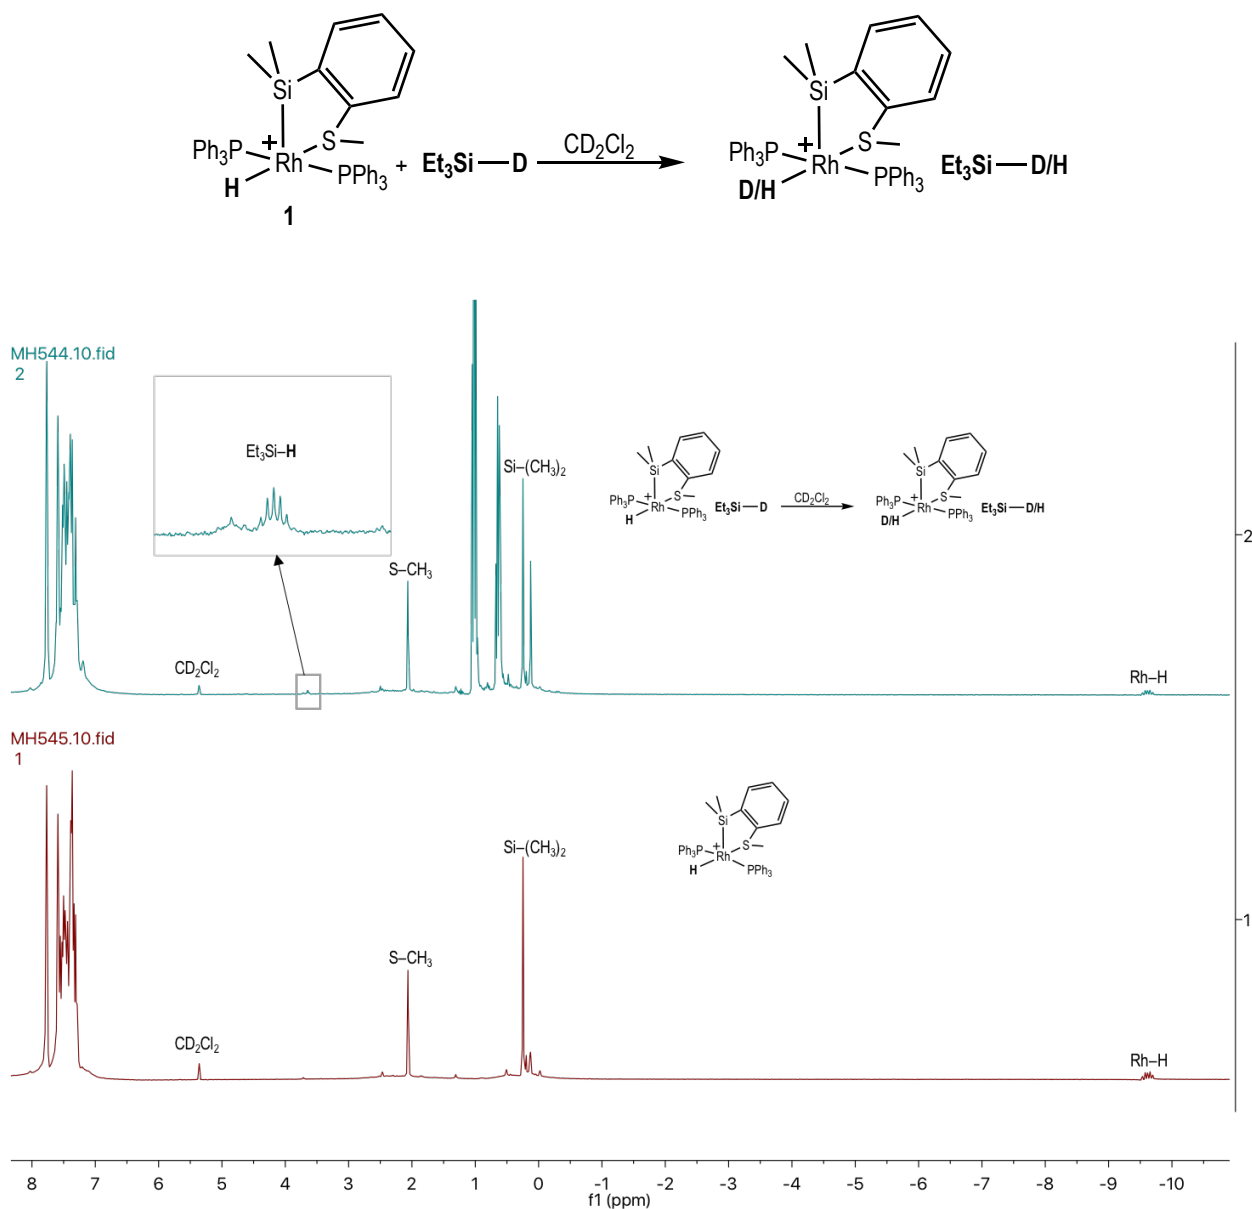

**Figure 28.**  $^1\text{H}$  NMR spectrum ( $\text{CD}_2\text{Cl}_2$ ) of **1** in presence of an equivalent of  $\text{Et}_3\text{SiD}$  after 10 minutes to has been prepared (top).  $^1\text{H}$  NMR spectrum ( $\text{CD}_2\text{Cl}_2$ ) of **1** (bottom).

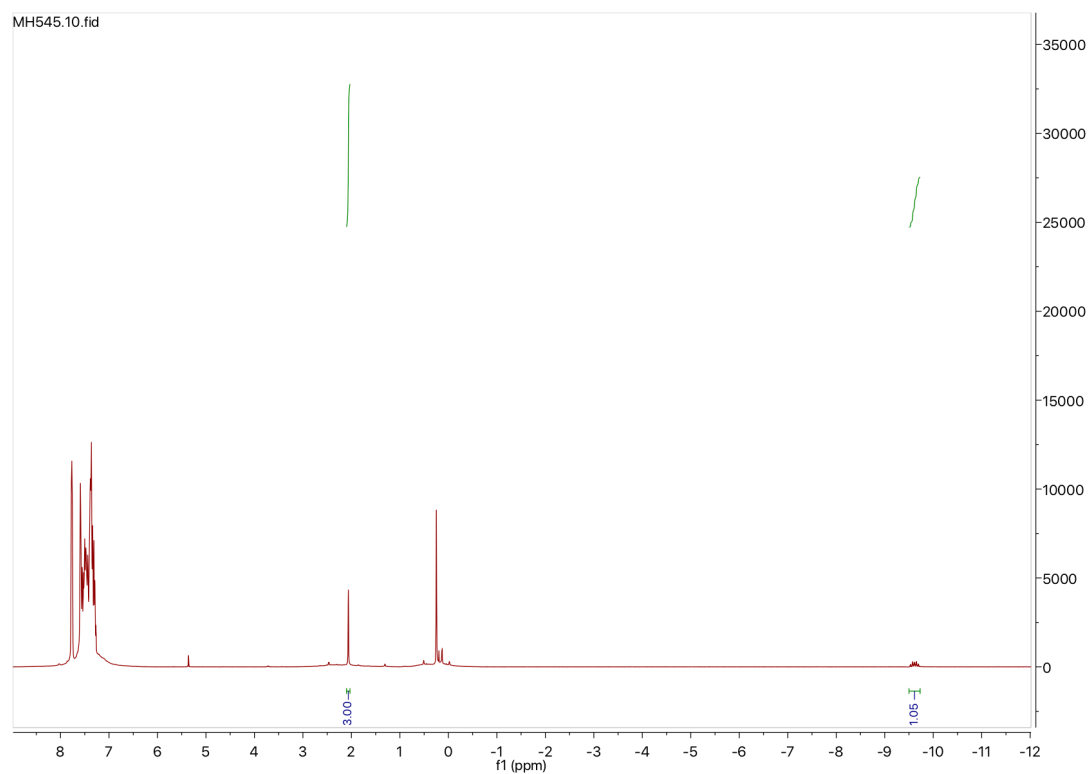

**Figure 29.** <sup>1</sup>H NMR spectrum (CD<sub>2</sub>Cl<sub>2</sub>) of **1**.

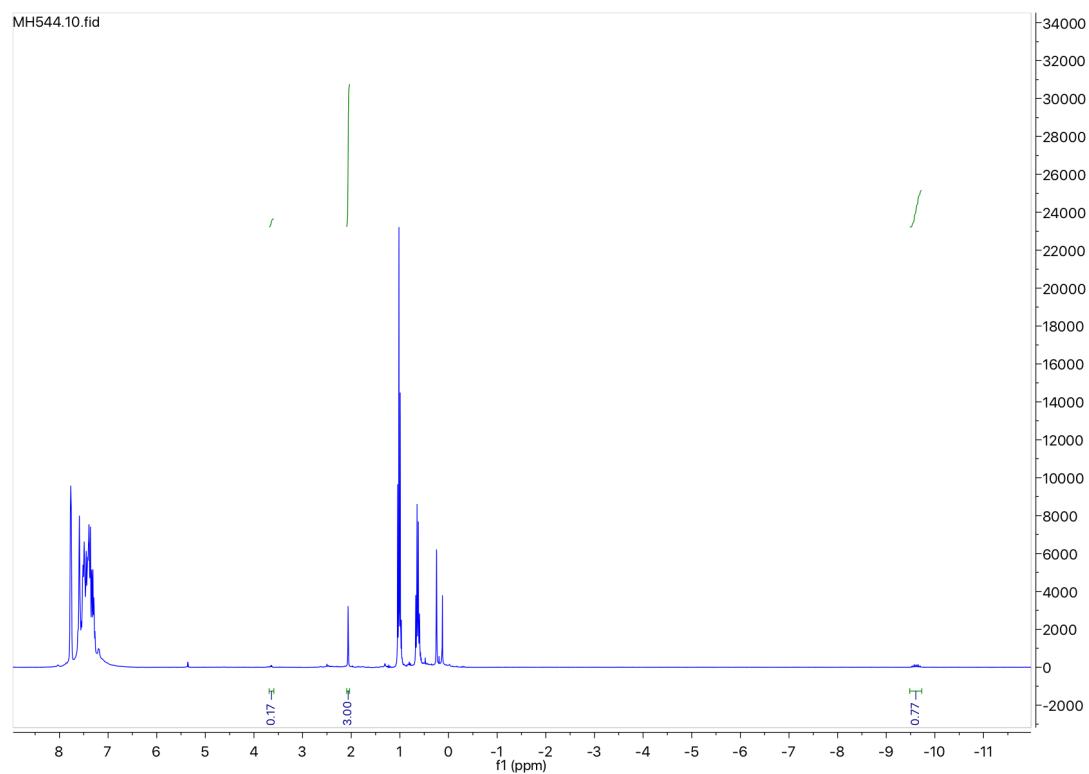

**Figure 30.** <sup>1</sup>H NMR spectrum (CD<sub>2</sub>Cl<sub>2</sub>) of **1** in presence of an equivalent of Et<sub>3</sub>SiD after 10 minutes to has been prepared.

## References

1. S. Azpeitia, M. A. Garralda and M. A. Huertos *ChemCatChem*, 2017, **9**, 1901-1905.
